1 **TANGO1 regulates membrane tension to mediate procollagen**  
2 **export**

3

4 Ishier Raote<sup>1</sup>, Maria F. Garcia-Parajo<sup>2,3</sup>, Vivek Malhotra<sup>1,3,4</sup>, and Felix Campelo<sup>2</sup>

5

6 <sup>1</sup> Centre for Genomic Regulation (CRG), The Barcelona Institute of Science and Technology,  
7 Barcelona, Spain.

8 <sup>2</sup> ICFO-Institut de Ciències Fòniques, The Barcelona Institute of Science and Technology,  
9 Castelldefels (Barcelona), Spain.

10 <sup>3</sup> Institució Catalana de Recerca i Estudis Avançats (ICREA), Barcelona, Spain.

11 <sup>4</sup> Universitat Pompeu Fabra (UPF), Barcelona, Spain.

12

13

14 **Corresponding authors:**

15 Felix Campelo

16 Tel: +34-93 554 2225

17 Fax: +34-93 553 4000

18 E-mail: felix.campelo@icfo.eu

19

20 Ishier Raote

21 Tel: +34-93 316 0187

22 Fax: +34-93 396 9983

23 E-mail: ishier.raote@crg.eu

24 **ABSTRACT**

25

26 **The endoplasmic reticulum (ER)-resident transmembrane protein TANGO1 assembles**  
27 **into rings around COPII subunits at ER exit sites (ERES), and links cytosolic membrane-**  
28 **remodeling machinery, tethers, and ER-Golgi intermediate compartment (ERGIC) mem-**  
29 **branes to procollagens in the ER lumen (Raote *et al.*, 2018). This arrangement is proposed**  
30 **to create a direct route for transfer of procollagens from ERES to ERGIC membranes.**  
31 **Here, we present a physical model in which TANGO1 forms a linear filament that wraps**  
32 **around COPII lattices at ERES to stabilize the neck of a growing carrier on the cytoplas-**  
33 **mic face of the ER. Importantly, our results show that TANGO1 can induce the formation**  
34 **of transport intermediates by regulating ER membrane tension. Altogether, our theoret-**  
35 **ical approach provides a mechanical framework of how TANGO1 acts as a membrane**  
36 **tension regulator to control procollagen export from the ER.**

## 37 INTRODUCTION

38 Multicellularity requires not only the secretion of signaling proteins –such as neurotransmitters,  
39 cytokines, and hormones– to regulate cell-to-cell communication, but also of structural proteins  
40 such as collagens, which form basement membranes and more generally the extracellular ma-  
41 trix (ECM) (Kadler *et al.*, 2007; Mouw, Ou and Weaver, 2014). These extracellular assemblies  
42 of collagens are necessary for skin biogenesis and to form the connective tissues. ECM also  
43 likely acts as a ruler to control the size of a tissue. Collagens, like all secretory proteins, contain  
44 a signal sequence that targets their *de novo* synthesis into the endoplasmic reticulum (ER). After  
45 their glycosylation, folding and trimerization, the bulky procollagens are exported from the ER  
46 to the Golgi complex and thence to the exterior of the cells. The export domains of secretory  
47 cargoes, named the ER exit sites (ERES), are a fascinating subdomain of the ER, but the basic  
48 understanding of how these domains are created and segregated from rest of the ER for the  
49 purpose of cargo export still remains a major challenge. The discovery of TANGO1 as a key  
50 player that sits at ERES has made the process of procollagen export and the organization of  
51 ERES amenable to molecular analysis (Bard *et al.*, 2006; Saito *et al.*, 2009; Wilson *et al.*, 2011).

52 In the lumen of the ER, The SH3 domain of TANGO1 binds procollagen via HSP47 (Saito *et al.*  
53 *et al.*, 2009; Ishikawa *et al.*, 2016) (**Figure 1A**). On the cytoplasmic side, TANGO1 has a proline-  
54 rich domain (PRD) and two coiled-coil domains (CC1 and CC2) (**Figure 1A**). The PRD of  
55 TANGO1 interacts with the COPII components Sec23A and Sec16 (Saito *et al.*, 2009; Ma and  
56 Goldberg, 2016; Maeda, Katada and Saito, 2017); the CC1 domain binds the  
57 NBAS/RINT1/ZW10 (NRZ) tethering complex to recruit ER-Golgi intermediate compartment  
58 (ERGIC) membranes (Santos *et al.*, 2015; Raote *et al.*, 2018); and the CC2 domain oligomer-  
59 izes with proteins of the TANGO1 family (such as TANGO1 itself, the TANGO1-like protein  
60 cTAGE5, and the spliced isoform TANGO1-Short) (Saito *et al.*, 2011; Maeda, Saito and  
61 Katada, 2016; Raote *et al.*, 2018). Recently, we visualized procollagen export domains with  
62 high lateral spatial resolution using stimulated emission depletion (STED) nanoscopy in mam-  
63 malian tissue cultured cells (Raote *et al.*, 2017, 2018). These studies revealed that TANGO1  
64 organizes at the ERES into ring-like structures, of ~200 nm in diameter, that corral COPII com-  
65 ponents. Moreover, an independent study showed that TANGO1 rings are also present in *Dro-*  
66 *sophila melanogaster* (Liu *et al.*, 2017).

67 To further extend these findings, we combined STED nanoscopy with genetic manipulations  
68 and established that TANGO1 rings are organized by (i) lateral self-interactions amongst  
69 TANGO1-like proteins, (ii) radial interactions with COPII subunits, and (iii) tethering of small  
70 ER-Golgi intermediate compartment (ERGIC) vesicles to assist in the formation a procollagen-  
71 containing transport intermediate (Raote *et al.*, 2018). Overall, the accumulated data suggest a  
72 mechanism whereby TANGO1 assembles into a functional ring, which selectively gathers and  
73 organizes procollagen, remodels the COPII budding machinery, and recruits ERGIC mem-  
74 branes for the formation of a procollagen-containing transport intermediate. However, the bio-  
75 physical mechanisms governing these events and how they are regulated by TANGO1 remain  
76 unknown.

77 Here, we present and analyze a biophysical model of TANGO1 ring assembly around polymer-  
78 izing COPII-coated structures. Our model allows us to address: (i) the physical mechanisms by  
79 which TANGO1 and its interactors assemble into functional rings at ERES, forming a fence  
80 around COPII coat components; and (ii) how TANGO1 fence can couple membrane tension in

81 two compartments to modulate the formation of carriers at the ERES. Overall, we propose a  
82 novel mechanism of TANGO1-regulated procollagen export, which consists of two sequential  
83 steps. First, TANGO1 rings, at the edge of a polymerizing COPII structure, stabilize the neck  
84 of a growing procollagen-containing transport export intermediate and thus prevent premature  
85 carrier fission. Second, carrier growth can be stimulated by the ability of TANGO1 to act as a  
86 membrane tension regulator by tethering ERGIC membranes. Importantly, we show that  
87 TANGO1-mediated local reduction of the membrane tension at the ERES reduces the energy  
88 barrier required for carrier growth.

89

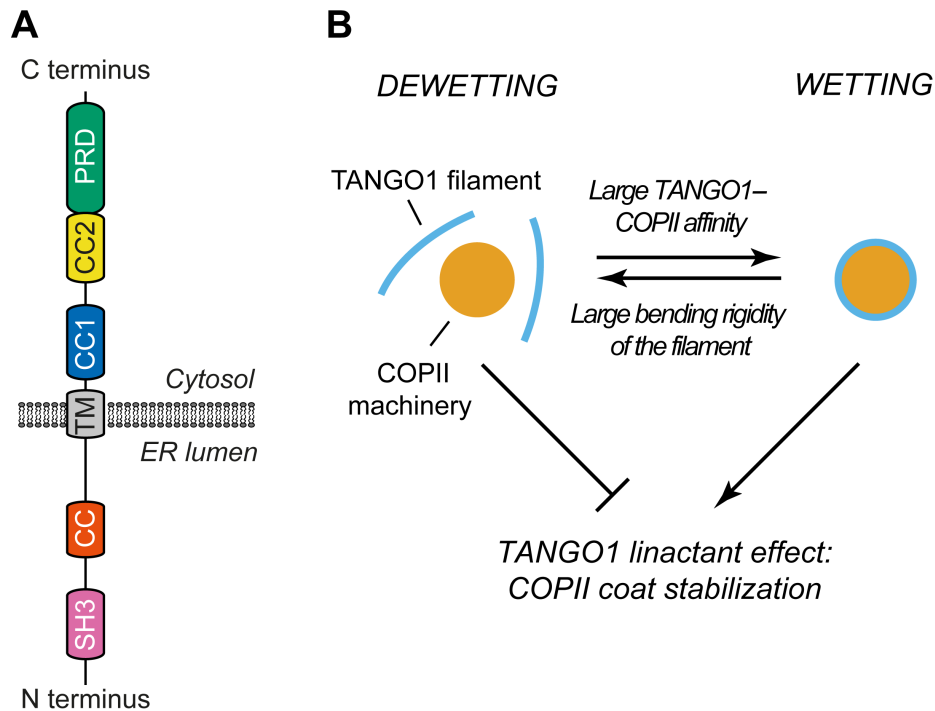

90

91

92 **Figure 1. Qualitative description of the physical model of TANGO1 ring formation.**

93 **(A)** Schematic representation of the domain structure and topology of TANGO1, indicating the SH3 domain,  
94 a luminal coiled-coiled domain (CC), the one and a half transmembrane region (TM), the coiled-coiled  
95 1 (CC1) and 2 (CC2) domains, and the PRD. **(B)** Schematic description of the TANGO1 ring formation  
96 model. ERES consisting of COPII subunits assemble into in-plane circular lattices (orange),  
97 whereas proteins of the TANGO1 family assemble into filaments by lateral protein-protein interactions  
98 (light blue). A tug-of-war between the affinity of the TANGO1 filament to bind COPII subunits (promoting  
99 wetting) and the resistance of the filament to be bent (promoting dewetting) controls the wetting-dewetting  
100 transition. Only when TANGO1 wets the COPII lattice, it acts as a linactant by stabilizing the peripheral  
101 COPII subunits.

102

## 103 RESULTS AND DISCUSSION

### 104 PHYSICAL MODEL OF TANGO1 RING FORMATION

#### 105 Experimental basis and assumptions of the model

106 To assess and rationalize the mechanisms by which TANGO1 assembles into rings at ERES,  
107 we propose a physical model built on accumulated experimental data.

108 First, we hypothesize that TANGO1 forms a filament that can be held together by lateral pro-  
109 tein-protein interactions between TANGO1-family proteins (TANGO1, cTAGE5 and  
110 TANGO1-Short) (Raote *et al.*, 2018). This hypothesis is based on the following observations:  
111 (i) TANGO1 is seen in a ring-like filamentous assemblies by STED nanoscopy (Raote *et al.*,  
112 2017); (ii) the direct 1:1 binding between TANGO1 and cTAGE5 CC2 domains (Saito *et al.*,  
113 2011); (iii) the ability of TANGO1-Short and cTAGE5 to form oligomers and oligomeric com-  
114 plexes together with Sec12 and TANGO1 (Maeda, Saito and Katada, 2016); and (iv) the ability  
115 of TANGO1 and TANGO1-Short to directly homo-dimerize by their CC1 domains (Raote *et al.*,  
116 2018). Such a filament would grow by the assembly of TANGO1-family proteins, which  
117 we propose to occur in a linear or quasi-linear fashion, thus forming a filament rather than a  
118 protein aggregate or protein cluster. From an elastic point of view, such a filament is subject to  
119 internal strains and stresses and therefore will resist bending away from its preferred shape or  
120 curvature. Evidence for the existence of linear assemblies of transmembrane proteins has in-  
121 deed been reported in the context of transmembrane actin-associated (TAN) lines that couple  
122 outer nuclear membrane components to actin cables (Luxton *et al.*, 2010).

123 Second, we hypothesize that TANGO1 stabilizes the edges of the COPII lattice by reducing the  
124 line energy of the ERES (Glick, 2017). COPII coat assembly at the ERES occurs by polymeri-  
125 zation of the individual COPII subunits into a lattice (Aridor, 2018). This process starts with  
126 activation and membrane binding of Sar1 GTPase, which recruits Sec23-Sec24 heterodimers  
127 that form the inner layer of the COPII coat. Subsequently, the second layer of the coat, com-  
128 posed of Sec13-Sec31 subunits, is recruited to the ERES, eventually leading to the budding of  
129 a COPII-coated vesicle. The free energy of coat polymerization includes the binding free energy  
130 of the COPII subunits, the elastic penalty of bending the membrane underneath, and also the  
131 line energy due to the unsatisfied binding sites of COPII subunits occupying the edges of the  
132 growing lattice. Because proteins of the TANGO1 family physically interact with the COPII  
133 components Sec23, Sec16, and Sec12, we argue that by binding to COPII subunits placed at  
134 the periphery of the growing coat (Ma and Goldberg, 2016; Hutchings *et al.*, 2018; Raote *et al.*,  
135 2018), TANGO1 stabilizes the domain boundary, effectively reducing its line energy. In anal-  
136 ogy to surfactants –molecules that adsorb into liquid-liquid two-dimensional interfaces decreas-  
137 ing their surface tension–, we propose that by binding to COPII subunits, TANGO1 proteins  
138 act as line-active agents, or *linactants* (Trabelsi *et al.*, 2008). In the context of HIV gp41-me-  
139 diated membrane fusion, it has been shown that linactant compounds, such as vitamin E, lower  
140 the interfacial line tension between different membrane domains to inhibit HIV fusion (Yang,  
141 Kiessling and Tamm, 2016).

142 Third, we hypothesize that TANGO1 plays a role in regulating ERES organization and size  
143 through biochemical interactions that can alter the normal kinetics of COPII assembly and dis-  
144 assembly. Indeed, the self-assembly of COPII-coated domains or growing buds at the ERES is  
145

150 a complex spatiotemporal dynamic process that involves GTP hydrolysis, protein turnover and  
151 diffusion, domain fusion, and transport carrier budding and fission events (Heinzer *et al.*, 2008).  
152 Remarkably, during this dynamic evolution, both the number and average size of ERES remain  
153 approximately constant (Bevis *et al.*, 2002): in normal conditions, mammalian cells display  
154 hundreds of ERES with diameters of about half a micron (Hammond and Glick, 2000; Farhan  
155 *et al.*, 2008; Heinzer *et al.*, 2008). Brownian dynamics simulations of a spatiotemporal model  
156 of ERES assembly indicated that the COPII turnover kinetics play a key regulatory role in con-  
157 trolling ERES size distribution (Heinzer *et al.*, 2008). Besides, those simulations also suggested  
158 a role for Sec16 in controlling the cooperative binding of COPII subunits to the ERES and thus  
159 in establishing their size distribution. We experimentally base our hypothesis on (i) the known  
160 interaction between TANGO1 and Sec16 (Maeda, Katada and Saito, 2017); (ii) the ability of  
161 cTAGE5 to recruit the Sar1 guanine-nucleotide exchange factor Sec12 (Saito *et al.*, 2014;  
162 Sasaki *et al.*, 2018); and (iii) the findings in *D. melanogaster* that loss of TANGO1 leads to  
163 smaller ERES, whereas its overexpression induces the formation of more and larger ERES (Liu  
164 *et al.*, 2017).

165

### 166 **Formulation of a biophysical model for TANGO1 ring formation**

167 Our model can be qualitatively described as a tug-of-war between different driving forces: the  
168 resistance to bending of TANGO1 filaments, the linactant effect of TANGO1 on COPII-coated  
169 ERES, and the TANGO1-mediated biochemical modulation of COPII dynamics. These differ-  
170 ent forces can favor, prevent, or modulate the formation of TANGO1 rings around COPII coats  
171 at ERES. For instance, if the resistance to bending of the TANGO1 filament is relatively small  
172 or the binding affinity of TANGO1 for the COPII subunits is relatively large, the filament will  
173 easily adapt its shape by wrapping around COPII patches forming a TANGO1 ring (a process  
174 we refer to as ERES *wetting*) (**Figure 1B**). As a result, there will be a linactant effect of  
175 TANGO1 on COPII-coated ERES that will reduce the line energy, thus limiting the growth of  
176 the ERES and the size of the TANGO1 rings (**Figure 1B**). By contrast, if TANGO1 filaments  
177 are very rigid or the affinity of TANGO1 proteins for COPII subunits is low (for instance, in  
178 cells expressing mutants of TANGO1 with reduced or abrogated interaction to COPII proteins),  
179 ERES wetting by the filament will be energetically unfavorable and as a results TANGO1 will  
180 not act as a COPII linactant (**Figure 1B**).

181

182 To quantitatively analyze this hypothesis, we start by considering a two-dimensional scenario  
183 where both TANGO1 filaments and COPII coats lie on the plane of a flat two-dimensional  
184 membrane (the role of the membrane curvature and the three-dimensional organization of the  
185 different molecular players to form a transport intermediate is described in the second part of  
186 this article). We use a coarse-grained, continuum model, which implicitly considers TANGO1  
187 family proteins (TANGO1, cTAGE5 and TANGO1-Short) and TANGO1-binding COPII sub-  
188 units. Here, the “microscopic” interaction energies are averaged out into “macroscopic” free  
189 energies, such as the filament bending energy, or the coat line energy. Although simplistic in  
190 nature, this continuum model is a suitable choice for a semi-quantitative description of the main  
191 physical mechanisms driving ring formation, as structural data on TANGO1 proteins are cur-  
192 rently lacking.

193

194 For the sake of simplicity, we consider in our physical model that the ER membrane contains a  
195 certain number of independent, non-interacting COPII-enriched domains of radius  $R$ , distrib-  
196 uted following a hexagonal array, with a center-to-center distance,  $a$ , between domains (**Figure**  
197 **S1A**). To understand the effect of proteins of the TANGO1 family on the size and shape of

198 COPII domains along the ER membrane, we need to consider the different protein interactions  
 199 outlined above, namely (i) TANGO1-TANGO1 interactions, which control the bending energy  
 200 of the TANGO1 filament; (ii) TANGO1 interaction with peripheral COPII subunits, which  
 201 controls the line energy of the COPII domain; and (iii) TANGO1 interaction with regulatory  
 202 COPII proteins, which controls COPII polymerization kinetics. In sum, the total free energy of  
 203 the system is the addition of these different free energy terms (see **Equations (M1–M4)** in Ma-  
 204 terials and Methods, where a detailed mathematical description of the elastic model of  
 205 TANGO1 ring formation is presented). We consider that the total surface area of our system  
 206 and the total surface area covered by ERES is fixed, so instead of working with the extensive  
 207 free energy of the system,  $F$ , we will work with the intensive free energy per unit ERES  
 208 area,  $f = F/A_{ERES}$ . This free energy density for a system of circular domains of radius  $R$  can  
 209 be represented as (see Materials and Methods)

$$210$$

$$211 \quad f = \frac{\kappa_T \omega}{R} (1/R - c_0)^2 + \frac{2\lambda_0}{R} \left(1 - \frac{\Delta\lambda}{\lambda_0} \omega\right) + \frac{1}{2} f_0 (R - R_0)^2, \quad (1)$$

212  
 213 where  $\omega$  is the wetting fraction, which represents the fraction of ERES boundary length asso-  
 214 ciated with TANGO1 molecules; and  $R$  is the radius of the TANGO1 ring. The first term of  
 215 **Equation (1)** represents the bending energy of the filament, and depends on two elastic param-  
 216 eters: the bending rigidity of the TANGO1 filament,  $\kappa_T$ , and the preferred curvature of the  
 217 filament,  $c_0$ . The second term of **Equation (1)** represents the line energy of the COPII lattice,  
 218 which depends on the COPII coat line tension in the absence of stabilizing TANGO1 molecules,  
 219  $\lambda_0$ , and on the COPII line tension reduction due to the linactant effect of TANGO1,  $\Delta\lambda$ . The  
 220 third term of **Equation (1)** represents the phenomenological term associated with COPII as-  
 221 sembly kinetics, which in turn depends on two phenomenological parameters: a coupling pa-  
 222 rameter,  $f_0$ , and a length scale,  $R_0$  (see Materials and Methods for a detailed description of the  
 223 model and the parameters). **Equation (1)** can be written by using dimensionless parameters as,  
 224

$$225 \quad \bar{f} = \frac{\bar{\kappa}_T \omega}{\rho} (1/\rho - \bar{c}_0)^2 + \frac{2}{\rho} (1 - \bar{\Delta}\lambda \omega) + \frac{1}{2} \bar{f}_0 (\rho - 1)^2, \quad (2)$$

226  
 227 where the dimensionless parameters are defined as  $\bar{f} = \frac{f\lambda_0}{R_0}$ ,  $\bar{f}_0 = \frac{f_0 R_0^3}{\lambda_0}$ ,  $\bar{\kappa}_T = \frac{\kappa_T}{R_0^2 \lambda_0}$ ,  $\bar{c}_0 =$   
 228  $c_0 R_0$ ,  $\bar{\Delta}\lambda = \frac{\Delta\lambda}{\lambda_0}$ , and  $\rho = \frac{R}{R_0}$ .

229  
 230

### 231 **Elastic parameters of the ring assembly model**

232 The free energy per unit area, **Equation (1)**, depends on a number of physical parameters related  
 233 to protein-protein interactions, namely the bending rigidity of the TANGO1 filament,  $\kappa_T$ ; the  
 234 preferred curvature of the filament,  $c_0$ ; the line tension of the polymerizing COPII coat,  $\lambda_0$ ; the  
 235 line tension reduction of TANGO1,  $\Delta\lambda$ ; and the phenomenological parameters,  $f_0$  and  $R_0$ . The  
 236 elastic parameters of the TANGO1 filament,  $\kappa_T$  and  $c_0$ , depend on the chemistry of the bonds  
 237 between the different proteins within a TANGO1 filament. As we lack experimental data on  
 238 the value of these parameters, we consider them within a wide range of reasonable values.  
 239 Typical values of the bending rigidity of intracellular filaments, such as intermediate filaments,  
 240 are of the order of  $\kappa_{IF} = 2000 \text{ pN} \cdot \text{nm}^2$  (Fletcher and Mullins, 2010), which we consider as  
 241 an upper limit for the rigidity of a TANGO1 filament. In addition, by taking  $\kappa_T = 0$ , we can  
 242 exploit our model to study the case where TANGO1 proteins do not form a cohesive filament

243 by attractive lateral protein-protein interactions. The line tension of the polymerizing COPII  
244 coat,  $\lambda_0$ , has not been, to the best of our knowledge, experimentally measured. Nevertheless,  
245 the line tension of clathrin coats, which lead to the formation of vesicles of a size comparable  
246 to the standard COPII vesicles, has been recently measured, yielding a value of  $\lambda_{clathrin} =$   
247  $0.05 pN$  (Saleem *et al.*, 2015). We use this value as a starting estimation, which we will vary  
248 within a certain range. Finally, the two phenomenological parameters can be related to each  
249 other and to the average size of ERES in stationary conditions,  $R_{ERES} \sim 200 nm$  (Heinzer *et al.*,  
250 2008), as  $R_0 = R_{ERES} \left(1 - \frac{2\lambda_0}{f_0 R_{ERES}^3}\right)$ , implying that  $0 \leq R_0 \leq R_{ERES}$  (see Supplementary In-  
251 formation).

252

### 253 **A wetting-dewetting transition describes the formation of TANGO1 rings at** 254 **ERES**

255 ERES formation is a highly dynamic process, and once ERES are formed they are long-lived  
256 structures with a fast protein turnover (Forster *et al.*, 2006; Hughes *et al.*, 2009). Moreover, at  
257 steady state, an average number and size distribution of ERES is experimentally found  
258 (Hammond and Glick, 2000; Heinzer *et al.*, 2008). Hence, we considered that the steady-state  
259 average ERES size corresponds to the minimum of the total free energy of the system **Equation**  
260 **(2)** and determined the conditions promoting or preventing filament wrapping around COPII  
261 patches, which we refer to as ERES wetting. This configuration of minimal free energy is ac-  
262 quired by optimizing the free parameters of the model, namely the dimensionless size of the  
263 ERES,  $\rho$ , and the wetting fraction,  $\omega$ .

264

265 Since the free energy in **Equation (2)** has a linear dependence on the wetting fraction,  $\omega$ , it is  
266 monotonic with respect to this variable and therefore energy minimization will drive the system  
267 to either complete wetting ( $\omega = 1$ ), or complete dewetting ( $\omega = 0$ ), depending on the sign of  
268  $\partial \bar{f} / \partial \omega$ . Hence, the wetting-dewetting transition corresponds, for a fixed value of the ERES  
269 size, to a stationary point of the free energy with respect to the wetting fraction,  $\partial \bar{f} / \partial \omega = 0$ .  
270 This condition sets a critical value of the TANGO1 line tension reduction, which defines the  
271 wetting-dewetting transition,

272

$$273 \quad \bar{\Delta \lambda}^{wett} = \bar{\kappa}_T / 2(1/\rho - \bar{c}_0)^2. \quad (3)$$

274

275 For  $\bar{\Delta \lambda} > \bar{\Delta \lambda}^{wett}$ , there is complete wetting of COPII domains by TANGO1 and thus full for-  
276 mation of TANGO1 rings; whereas for  $\bar{\Delta \lambda} < \bar{\Delta \lambda}^{wett}$ , there is dewetting and TANGO1 fila-  
277 ments are absent from COPII domains and no TANGO1 rings are formed (**Figure 2A**). Since  
278 the values of  $\bar{\Delta \lambda}^{wett}$  are between 0 (no linactant effect) and 1 (full linactant effect), we can  
279 define a critical filament bending rigidity,  $\bar{\kappa}^{dewett} = 2/(1/\rho - \bar{c}_0)^2$ , above which there is  
280 complete dewetting of ERES by TANGO1 regardless of the value of  $\bar{\Delta \lambda}$  (**Figure 2A**). Simi-  
281 larly, complete wetting occurs for any values of  $\bar{\Delta \lambda}$  only if  $\bar{\kappa}_T = 0$  or if  $\bar{c}_0 = 1/\rho$  (**Figure 2A**).

282



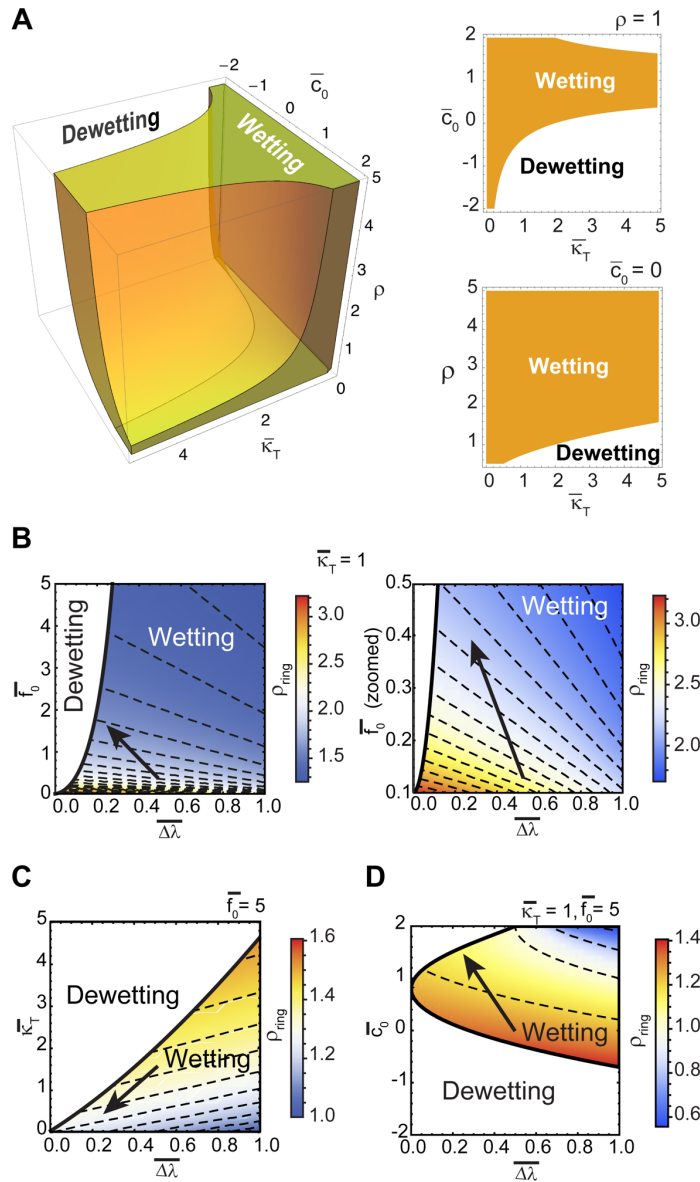

**Figure 2. A wetting-dewetting transition controls the formation and size of TANGO1 rings.**

(A) Wetting-dewetting phase diagram. The three-dimensional diagram (left) indicates the region in the parameter space (orange region) where the system is under a wetting condition and hence TANGO1 rings surrounding ERES are to be expected. The diagram is shown as a function of the bending rigidity of the TANGO1 filament,  $\bar{\kappa}_T$ , the filament spontaneous curvature,  $\bar{c}_0$ , and the size of the ring,  $\rho$ , all in dimensionless units (see text). The right plots show cross-sections of the three-dimensional diagram at the indicated planes. (B-D) Numerically computed phase diagrams showing the wetting-dewetting transitions (solid black lines) as a function of the line tension reduction ( $\bar{\Delta}\lambda$ ) and the dimensionless coupling factor,  $\bar{f}_0$  (B); the filament bending rigidity,  $\bar{\kappa}_T$ , (C); or the spontaneous curvature,  $\bar{c}_0$  (D). The fixed parameters are indicated on the top part of the plots. In the parameter space where wetting is predicted, the optimal ring size,  $\rho_{ring}$ , is shown in color code. Dashed lines represent the iso-size lines, and arrows represent possible trajectories in the parameter space allowing for a reduction in the TANGO1 ring size while reducing affinity of TANGO1 filament for COPII subunits. In (B) we show the plots where the value of the coupling parameter,  $\bar{f}_0$ , takes a broad range of values (left graph), or a narrower, zoomed range of values (right graph). In (B, C) the filament spontaneous curvature is equal to 0.

283  
284  
285  
286  
287  
288  
289  
290  
291  
292  
293  
294  
295  
296  
297  
298  
299  
300  
301  
302  
303

## 304 Computation of the preferred size of TANGO1 rings

305 TANGO1 rings surround COPII components (Raote *et al.*, 2017), corresponding to a filament  
306 full wetting condition (that is,  $\omega = 1$ ), as presented in **Figure 1B** (analysis of the ERES size in  
307 dewetting conditions is presented in the Supplementary Information). Under wetting condi-  
308 tions, a ring of radius  $R_{ring}$  is formed by a TANGO1 filament wrapping around a COPII patch.  
309 The value of the optimal dimensionless ring size,  $\rho_{ring} = R_{ring}/R_0$ , is obtained by minimizing  
310 **Equation (2)** in wetting conditions, which is equivalent to solve the fifth order algebraic equa-  
311 tion,

$$312 \bar{f}_0 \rho^4 (\rho - 1) - 2 \left( 1 - \overline{\Delta\lambda} + \frac{1}{2} \bar{c}_0^2 \bar{\kappa}_T \right) \rho^2 + 4 \bar{c}_0 \bar{\kappa}_T \rho - 3 \bar{\kappa}_T = 0. \quad (4)$$

314  
315 Because **Equation (4)** cannot be analytically solved, we opted to solve it numerically for dif-  
316 ferent values of the model's parameters. As a starting point, we took the parameter values  $\kappa_T =$   
317  $500 \text{ pN} \cdot \text{nm}^2$  (corresponding to the TANGO1 filaments having a persistence length of  $\xi_p \approx$   
318  $120 \text{ nm}$ ),  $R_0 = 100 \text{ nm}$ ,  $\lambda_0 = 0.05 \text{ pN}$  (see **Table 1**), which yields  $\bar{\kappa}_T = 1$ . We then looked  
319 for the solutions of **Equation (4)** as a function of the dimensionless coupling parameter,  $\bar{f}_0$ , and  
320 of the relative line tension reduction,  $\overline{\Delta\lambda}$ . These results (**Figure 2B**), show that ring formation  
321 (wetting by the TANGO1 filament) can be induced by decreasing the coupling factor,  $\bar{f}_0$ , or by  
322 increasing the linactant strength of TANGO1,  $\overline{\Delta\lambda}$ . Since  $\overline{\Delta\lambda}$  essentially corresponds to the  
323 COPII–TANGO1 binding affinity, and hence our results indicate that TANGO1 rings are sta-  
324 bilized by the association of TANGO1 proteins with peripheral COPII subunits. Furthermore,  
325 our results also show that the size of the TANGO1 rings decreases with increasing values of  
326  $\overline{\Delta\lambda}$ , and with increasing values of  $\bar{f}_0$  (**Figure 2B**). Next, we computed the wetting-dewetting  
327 diagram and the optimal TANGO1 ring size in wetting conditions as a function of the relative  
328 line tension reduction,  $\overline{\Delta\lambda}$ , and of the bending rigidity,  $\bar{\kappa}_T$  (**Figure 2C, Figure S2A, B**), or the  
329 filament preferred curvature,  $\bar{c}_0$  (**Figure 2D, Figure S2D**), for fixed values of the dimension-  
330 less coupling parameter,  $\bar{f}_0$ . For completeness, in **Figure S2**, we show some more examples of  
331 the computed values of the dimensionless ring size,  $\rho$ , as a function of a wide range of the  
332 parameters of our model,  $\bar{f}_0$ ,  $\bar{\kappa}_T$ ,  $\bar{c}_0$ , and  $\overline{\Delta\lambda}$ . Altogether, these results indicate that rings are  
333 smaller for large values of the linactant strength of TANGO1,  $\overline{\Delta\lambda}$  (smaller effective line tension  
334 of the COPII lattice), for smaller values of the filament rigidity,  $\bar{\kappa}_T$ , and for larger (positive)  
335 values of the filament spontaneous curvature,  $\bar{c}_0$  (**Figure 2B-D**). In other words, both a large  
336 affinity of TANGO1 proteins for COPII subunits and a small resistance of the TANGO1 fila-  
337 ment to bending (which in structural terms can be thought of as a small lateral protein-protein  
338 interaction between the filament components) induce the formation of TANGO1 rings and tend  
339 to reduce the size of these rings.

## 340 341 Comparison with experimental results

342 We previously reported that cells expressing mutants of TANGO1 with abrogated binding to  
343 the COPII component Sec23 (TANGO1- $\Delta$ PRD mutant) present both smaller and less stable  
344 rings as compared to wild-type cells, including also the presence of some fused structures  
345 (Raote *et al.*, 2018). In cells expressing TANGO1- $\Delta$ PRD, the interaction between one of the  
346 filament components, TANGO1, and the COPII subunits is abolished, indicating that, although  
347 a TANGO1 filament could still be formed –this mutant does not alter the interaction between  
348 TANGO1 and other TANGO1 or cTAGE5 proteins (Raote *et al.*, 2018)–, the filament should  
349 be less line-active because the affinity to bind to the peripheral COPII subunits is reduced. In

350 this situation the filament proteins cTAGE5 (Saito *et al.*, 2011, 2014) and TANGO1-Short  
351 (Maeda, Saito and Katada, 2016) can still bind Sec23 and therefore reduce, albeit to a lesser  
352 extent than in wild-type cells, the COPII patch line energy. However, in our results presented  
353 in **Figure 2B-D** and **Figure S2**, we observed that a reduction of the linactant strength of  
354 TANGO1 (parameter  $\overline{\Delta\lambda}$ ) normally leads to an increase rather than a decrease of the ring size  
355 (see supplementary information for a more detailed discussion). To investigate how the lack of  
356 the PRD domain of TANGO1 contributes to form smaller rings, we explored how other differ-  
357 ential properties of TANGO1- $\Delta$ PRD in relation to those of TANGO1-WT could lead to the  
358 experimentally-observed reduction in ring sizes from about  $275\pm 70$  nm to  $170\pm 65$  nm (mean  
359 Feret's diameter of the ring) (Raote *et al.*, 2018). Our model predicts that the experimentally  
360 observed reduction of TANGO1- $\Delta$ PRD ring size needs to parallel either (i) spatio-temporal  
361 regulation by the PRD of ERES dynamics (such as an increase in the parameter  $\overline{f_0}$ ); (ii) a re-  
362 duction of the filament bending rigidity,  $\overline{\kappa_T}$ ; or (iii) an increase of the preferred curvature of  
363 the filament,  $\overline{c_0}$  (**Figure 2B-D**, black arrows). The analysis of the conditions that can promote  
364 the assembly of fused TANGO1 rings, as experimentally observed in cells expressing the  
365 TANGO1- $\Delta$ PRD mutant (Raote *et al.*, 2018), is presented in Appendix 1. Taken together, our  
366 results highlight the dual function of the PRD of TANGO1, which on one hand reduces the  
367 ability of TANGO1 to wet the ERES, and on the other hand must control, according to the  
368 predictions of our model, filament physical properties and/or the spatio-temporal dynamics of  
369 ERES.

370

371

## 372 TANGO1 RINGS CAN HELP ASSEMBLE LARGE TRANSPORT INTERMEDIATES

373

374 Can TANGO1 modulate the shape of a growing bud to accommodate large and complex car-  
375 goes? And, if so, would the TANGO1 ring structure be especially suited to achieve this task?  
376 To answer these questions, we put together a physical model of transport intermediate for-  
377 mation that incorporates the effects of TANGO1 ring formation and wetting as discussed above.  
378 In our model, we consider different scenarios under which TANGO1 can modulate the standard  
379 spherical COPII carrier formation.

380

### 381 Qualitative description of TANGO1-mediated transport intermediate formation

382 The formation of the canonical coated transport carriers (such as COPI-, COPII-, or clathrin-  
383 coated carriers) relies on the polymerization of a large-scale protein structure on the membrane  
384 surface, the protein coat. Polymerized coats usually adopt spherical shapes, which bend the  
385 membrane underneath accordingly (Faini *et al.*, 2013). Membrane bending is promoted if the  
386 binding energy of the coat to the membrane is larger than the energy required to bend the mem-  
387 brane and if the coat structure is more rigid than the membrane (Kozlov *et al.*, 2014; Saleem *et*  
388 *al.*, 2015). Hence, in the absence of a functional TANGO1, COPII coats generate standard 60-  
389 90 nm spherical transport carriers (**Figure 3A**). In this situation, the neck of the growing carrier  
390 prematurely closes without being able to fully incorporate long semi-rigid procollagen mole-  
391 cules, which are not efficiently recruited to the COPII export sites due to the lack of TANGO1  
392 (**Figure 3A**). In our model for TANGO1 ring formation, we proposed that one of the potential  
393 roles of such a ring is to act as a linactant to stabilize free COPII subunits at the edge of the  
394 polymerized structure (Glick, 2017; Raote *et al.*, 2017) and hence prevent or kinetically delay  
395 the premature closure of the bud neck (**Figure 3B**). Moreover, mechanical forces pointing to-

396 wards the cytosolic side of the bud, either from the ER lumen (e.g. TANGO1 pushing procollagen upwards) or from the cytosol (e.g. molecular motors pulling on the growing bud), will  
 397 induce the growth of the transport intermediate (Derényi, Jülicher and Prost, 2002; Roux *et al.*,  
 398 2002; Koster *et al.*, 2003; Leduc *et al.*, 2004; Watson *et al.*, 2005; Pinot, Goud and Manneville,  
 399 2010) (**Figure 3C**). This pulling force can however be counterbalanced by membrane tension,  
 400 which generally acts as an inhibitory factor preventing bud formation (Saleem *et al.*, 2015;  
 401 Hassinger *et al.*, 2017; Wu *et al.*, 2017) (**Figure 3C**). At the same time, by its TEER domain,  
 402 TANGO1 recruits the NRZ complex that tethers ERGIC53-containing membranes in apposition  
 403 to TANGO1 rings (Raote *et al.*, 2018) (**Figure 3D**). Fusion of such vesicles to the budding  
 404 site would deliver membrane lipids to the ER membrane, which rapidly and transiently induces  
 405 a local drop in membrane tension, hence overcoming the tension-induced arrest in transport  
 406 intermediate growth (**Figure 3E**). The shape and coat coverage of procollagen-containing export  
 407 intermediates remain, to the best of our knowledge, a matter of speculation. Both long  
 408 pearled tubes (**Figure 3E**) or long cylindrical vesicles have been proposed to function at the  
 409 level of the ER membrane (Mironov *et al.*, 2003; Zeuschner *et al.*, 2006; Robinson *et al.*, 2015;  
 410 Gorur *et al.*, 2017; Omari *et al.*, 2018; Yuan *et al.*, 2018). We recently proposed the alternative  
 411 possibility that a short-lived, transient direct tunnel between the ER and the ERGIC/Golgi com-  
 412 plex can allow for the directional export of cargoes from the ER (Raote and Malhotra, 2019).  
 413 In our model, TANGO1 rings help prevent the fission of the carrier and thus allow for the  
 414 formation of such tunnels between the ER and the ERGIC. Finally, COPII coats have a prefer-  
 415 ence to polymerize into spherical structures, although there is experimental evidence of tubular  
 416 COPII polymerization in vitro as observed by cryo-electron tomography (Zanetti *et al.*, 2013;  
 417 Hutchings *et al.*, 2018).  
 418  
 419

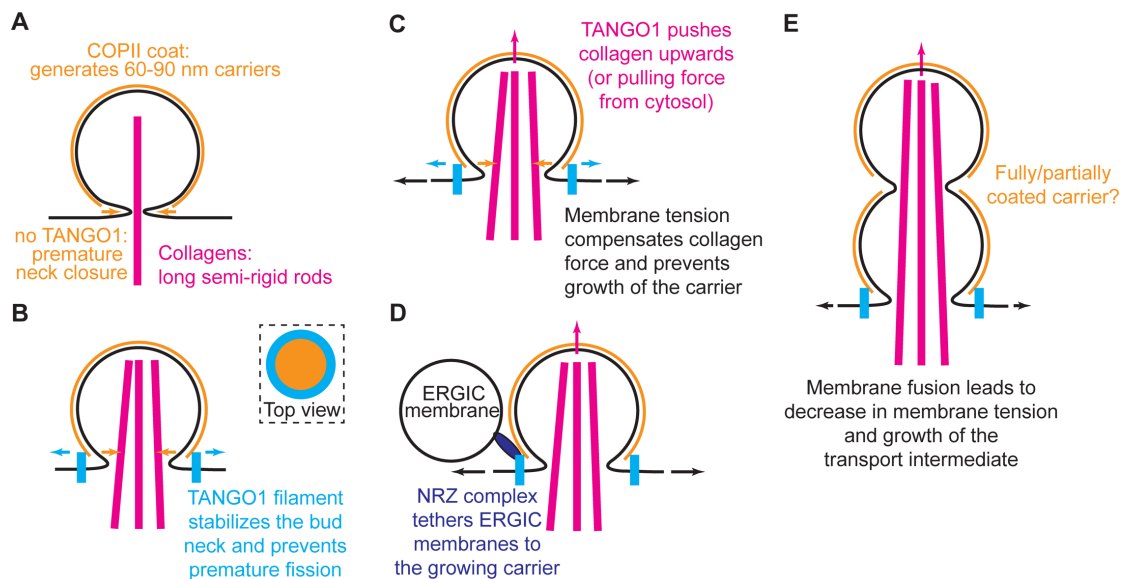

420  
 421

**Figure 3. Physical model of how TANGO1 can regulate the formation of procollagen-containing transport intermediates.**

422 (A) In the absence of functional TANGO1, COPII coated spherical vesicles assemble normally, generating  
 423 spherical carriers of between 60–90 nm in size. Procollagens cannot be packed into such small carriers.  
 424 (B) A TANGO1 filament sitting at the base of a growing COPII patch encircles COPII components as  
 425 experimentally observed (see top view in the top right subpanel) and packages procollagens to the export  
 426 sites. This TANGO1 fence can serve to stabilize the neck of the transport carrier hence preventing the  
 427 premature formation of a small carrier. (C) A possible cytosolically-directed force (procollagen pushing  
 428 from the inside or a pulling force from the cytosol) can work in the direction of generating a long interme-  
 429 diate. By contrast, large membrane tensions work to prevent carrier elongation. (D) The NRZ complex,  
 430  
 431

432 which is recruited to the procollagen export sites by the TANGO1 TEER domain, tethers ERGIC53-  
 433 containing membranes. (E) Fusion of these tethered membranes can lead to a local and transient de-  
 434 crease in the membrane tension, which can allow for the growth of the transport intermediate to be able  
 435 to include the long semi-rigid procollagen molecules. Whether the intermediate is fully or only partially  
 436 coated is still unknown.

437

438

### 439 **Physical model of TANGO1-dependent transport intermediate formation**

440 To quantitate the feasibility of the proposed pathway of transport intermediate growth (**Figure**  
 441 **3**), we developed a physical model that accounts for the relative contribution of each of these  
 442 forces to the overall free energy of the system. Such a model allows us to predict the shape  
 443 transitions from planar membrane to incomplete buds and to large transport intermediates. In-  
 444 tuitively, one can see that COPII polymerization favors the formation of spherical buds,  
 445 whereas TANGO1 linactant strength and filament bending prevent neck closure. Large out-  
 446 ward-directed forces promote the growth of long intermediates, whereas large membrane ten-  
 447 sions inhibit such a growth. Taking advantage of a recently developed theoretical model of  
 448 membrane elasticity in the context of clathrin-coated vesicle formation (Saleem *et al.*, 2015),  
 449 we expand on this model to include the aforementioned contributions of TANGO1-like proteins  
 450 in modulating COPII-dependent carrier formation. We consider that the ER membrane is under  
 451 a certain lateral tension,  $\sigma_0$ , and resists bending by a bending rigidity,  $\kappa_b$ . Growth of a COPII  
 452 bud starts by COPII polymerization into a spherical shape of radius  $R$ . The chemical potential  
 453 of the COPII coat,  $\mu_c$ , includes the COPII binding energy,  $\mu_c^0$ , and the bending energy of the  
 454 underlying membrane (see Materials and Methods). As explained in the ring-formation model,  
 455 incomplete buds are associated with a line tension of the free subunits,  $\lambda_0$ , which can be par-  
 456 tially relaxed by the wetting of a TANGO1 ring, hence reducing the line tension by an amount  
 457  $\Delta\lambda$ . In addition, we also consider the chemical potential of the TANGO1 ring,  $\mu_T$ , which ac-  
 458 counts for the filament assembly energy via lateral interactions,  $\mu_T^0$ , and the filament bending  
 459 energy. Next, we also account for the mechanical work of an outward-directed force,  $N$ , which  
 460 favors transport intermediate growth. Finally, the fusion of incoming ERGIC53-containing  
 461 membranes is accounted by a sharp and local reduction in the lateral membrane tension, by an  
 462 amount equal to  $\Delta\sigma$ . Altogether, we can write the total free energy per unit surface area with  
 463 respect to a naked flat membrane,  $f_c$ , as

464

$$465 \quad f_c = \frac{(\sigma_0 - \Delta\sigma) A_m - (\mu_c^0 - 2\frac{\kappa_b}{R^2}) A_c + 2\pi(\lambda_0 - \omega \Delta\lambda) \rho - 2\pi \left[ \mu_T^0 - \frac{\kappa_T}{2} \left( \frac{1}{R_T} - c_0 \right)^2 \right] R_T - Nh}{A_p}, \quad (5)$$

466

467 where  $A_m$  is the membrane surface area,  $A_c$  is the surface area of the membrane covered by the  
 468 COPII coat,  $A_p$  is the surface area of the carrier projection onto the flat membrane,  $\rho$  is the  
 469 radius of the base of the carrier,  $h$  is the height of the carrier, and  $R_T$  is the radius of the  
 470 TANGO1 ring (**Figure S3A**, and Materials and methods section). We consider that the carrier  
 471 adopts the equilibrium configuration, corresponding to the shape of minimum free energy,  
 472 **Equation (5)**. Although the system is not in equilibrium, this assumption will be valid as long  
 473 as the mechanical equilibration of the membrane shape is faster than the fluxes of the lipids and  
 474 proteins involved in the problem (Sens and Rao, 2013; Campelo *et al.*, 2017). Hence, assuming  
 475 local equilibrium, we calculated the shape of the carrier that minimizes **Equation (5)** under a  
 476 wide range of possible values of the elastic parameters of the system (see Materials and meth-  
 477 ods). We define  $\eta = h/2R$ , which is the height of the carrier divided by the diameter of a fully  
 478 formed bud, as a useful parameter to describe the shape of the transport intermediate. Taking

479 this into account, and assuming that the system has  $n \geq 0$  fully formed buds, we can write down  
 480 the free energy per unit area, **Equation (5)**, as (see Materials and methods):

481  
 482 
$$f_c =$$

$$483 \left\{ \begin{array}{l} \frac{\sigma - \tilde{\mu}}{1 - \eta} + \frac{\tilde{\lambda}}{\sqrt{\eta(1 - \eta)}} + \frac{\tilde{\kappa}_T}{[\eta(1 - \eta)]^{3/2}}, \quad \eta < 1/2 \\ \sigma[1 + 4n + 4(\eta - n)^2] - 4\tilde{\mu}\eta + 4\tilde{\lambda}\sqrt{(\eta - n)(1 - \eta + n)} + \frac{4\tilde{\kappa}_T}{\sqrt{(\eta - n)(1 - \eta + n)}}, \quad \eta > 1/2 \end{array} \right.$$

484 (6)

485 where  $\tilde{\mu} = \mu_c^0 - 2\frac{\kappa_b}{R^2} + \frac{N}{2\pi R}$  is the effective chemical potential, which depends on the binding  
 486 energy of the coat to the membrane, on the bending energy of the membrane, and on the applied  
 487 pulling/pushing force;  $\tilde{\lambda} = (\lambda_0 - \omega \Delta\lambda - \mu_T^0)/R$ , is the effective line tension of the coat; and  
 488  $\tilde{\kappa}_T = \kappa_T \omega / 8R^3$  is the renormalized bending rigidity of the TANGO1 filament. From the ex-  
 489 pression for the effective chemical potential,  $\tilde{\mu}$ , we can see that the application of a force in the  
 490 bud growth direction,  $N$ , plays the same role as the coat binding free energy,  $\mu_c^0$ , and therefore  
 491 helps counterbalance the elastic resistance of the membrane to deformation. In addition, the  
 492 lateral binding free energy of the TANGO1 filament,  $\mu_T^0$ , also helps, in wetting conditions, to  
 493 decrease the value of the effective coat line tension,  $\tilde{\lambda}$ , thus preventing premature closure of the  
 494 bud neck (**Figure 3**).

495

#### 496 **Functional TANGO1 rings can control transport intermediate formation by force** 497 **exertion and membrane tension regulation**

498 The free energy per unit area of the transport intermediate,  $f_c$ , has a non-trivial dependence on  
 499 the shape of the carrier, parametrized by the shape parameter,  $\eta$ , as given by **Equation (6)**. This  
 500 implies that multiple locally stable shapes, corresponding to different local minima of the free  
 501 energy, can coexist. To illustrate this dependence, the profile of the free energy per unit area,  $f_c$ ,  
 502 as a function of the shape parameter  $\eta$ , is shown for two different scenarios in **Figure 4A**. In  
 503 the first one, which corresponds to a situation where the COPII binding energy is relatively  
 504 small,  $\mu_c^0 = 0.012 k_B T / nm^2$  (top panel, **Figure 4A**), the global minimum of the free energy  
 505 corresponds to a shallow bud. Other locally stable shapes, corresponding to a shallow bud con-  
 506 nected to a set of spheres, can be found. By contrast, in the second scenario illustrated in **Figure**  
 507 **4A** (bottom panel), which corresponds to a situation of relatively large COPII binding energy,  
 508  $\mu_c^0 = 0.048 k_B T / nm^2$ , the transport intermediate will grow from an initially unstable shallow  
 509 bud (depicted in red, in **Figure 4A**, bottom panel) to a locally stable almost fully formed spher-  
 510 ical carrier (depicted in yellow, in **Figure 4A**, bottom panel). Then, overcoming an energy bar-  
 511 rier will result in further growth of the carrier into a large transport intermediate (depicted in  
 512 green, in **Figure 4A**, bottom panel). Next, we computed the profile of the free energy per unit  
 513 area,  $f_c$ , as a function of the shape parameter  $\eta$ , for different values of the COPII binding en-  
 514 ergy,  $\mu_c^0$ , and of the TANGO1 bending rigidity,  $\kappa_T$  (**Figure 4B**). These results show that the  
 515 bending rigidity of the TANGO1 filament, when assembled around the growing COPII bud,  
 516 leads to the existence of a high energy barrier in the transition from a single bud to a multiple  
 517 bud transport intermediate, or pearled tube (**Figure 4B**, compare dashed lines corresponding to  
 518 a TANGO1 filament with no bending rigidity to the solid lines, where the TANGO1 filament  
 519 is associated with a certain bending rigidity and therefore resists bending). A transition could  
 520 still occur in this latter case, since the shape transition could occur through transient dewetting  
 521 of the TANGO1 filament or through intermediate shapes between a cylindrical tube and a set

522 of spherical vesicles joined by a narrow connection, such as unduloids (see Materials and Meth-  
 523 ods).  
 524

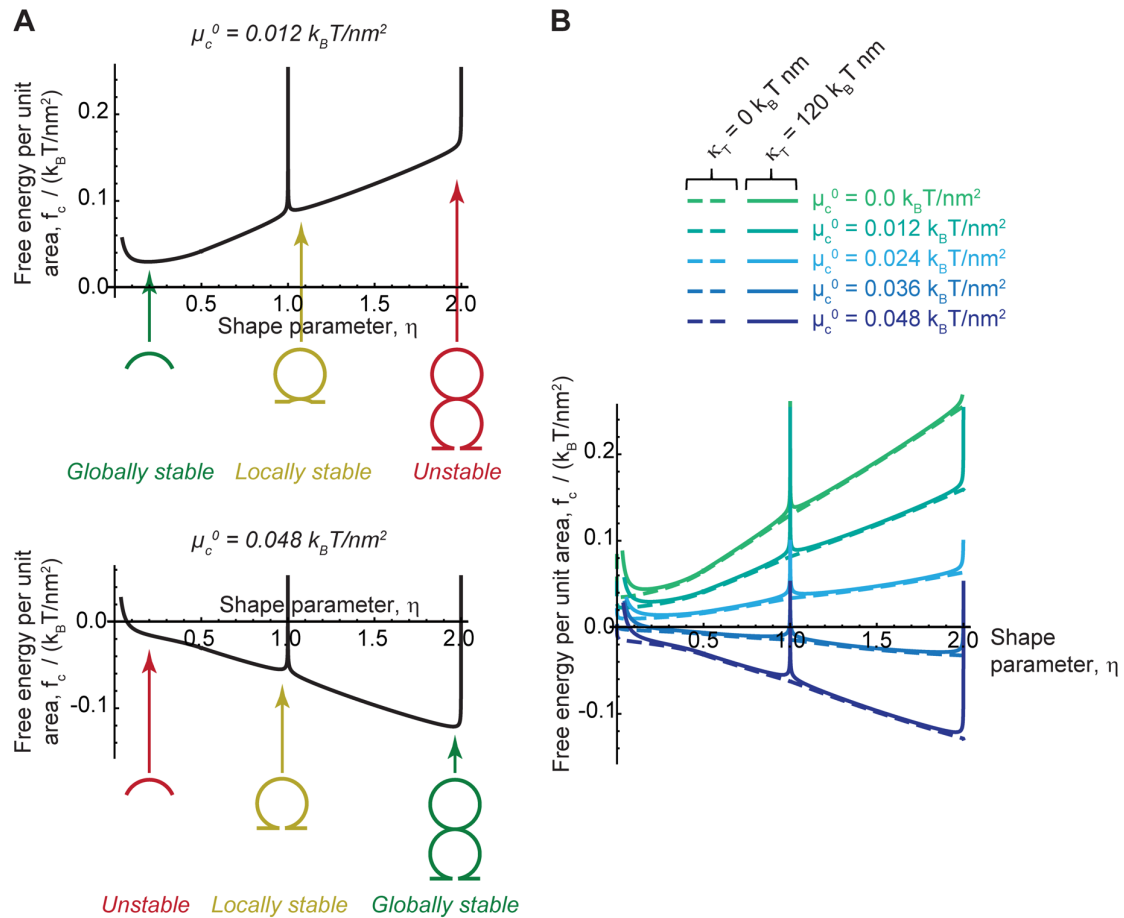

525  
 526

**Figure 4. Free energy profile of a transport intermediate as a function of its shape.**

(A) The free energy per unit area of the transport intermediate-TANGO1 system,  $f_c$ , plotted as a function of the shape parameter,  $\eta$ , for the COPII coat binding energy,  $\mu_c^0 = 0.012 k_B T nm^2$  (top plot), or  $\mu_c^0 = 0.048 k_B T nm^2$  (bottom plot). A schematic representation of the shape of the transport intermediate for different values of the shape parameter,  $\eta$ , is depicted, including locally stable shapes (in green), locally stable shapes (in dark yellow), as well as examples of unstable shapes (in red). (B) The free energy per unit area of the transport intermediate-TANGO1 system,  $f_c$ , plotted as a function of the shape parameter,  $\eta$ , for different values of the COPII coat binding energy,  $\mu_c^0$  (green-to-blue color-coded curves). The results are shown for the situation where we consider no TANGO1 filament (zero bending rigidity of the filament,  $\kappa_T = 0$ ; dashed curves) and also for the situation where a TANGO1 filament is assumed (non-zero bending rigidity of the filament,  $\kappa_T = 120 k_B T nm$ ; solid curves).

527  
 528  
 529  
 530  
 531  
 532  
 533  
 534  
 535  
 536  
 537  
 538  
 539

We next looked for the locally and globally stable shapes of the transport intermediate, by computing the local minima of the overall energy of the system per unit area, **Equation (6)**, for both single buds (shape parameter  $\eta < 1$ ) or for long transport intermediates (shape parameter  $\eta > 1$ ). In **Figure 5**, we show, for a wide range of the model's parameters, the optimal shape of the intermediate, as measured by the optimal shape parameter,  $\eta^*$ , and the corresponding free energy per unit area for both single incomplete buds ( $n = 0$ ;  $\eta^* < 1$ ) (light blue lines in **Figure 5**) and long intermediates containing one full bud plus an incomplete bud ( $n = 1$ ;  $1 < \eta^* < 2$ ) (orange lines in **Figure 5**). Our results indicate that the rigidity of the TANGO1 filament has no effect on the shape of the transport intermediate and does not trigger the elongation of the

540  
 541  
 542  
 543  
 544  
 545  
 546  
 547  
 548

549 COPII bud (**Figure 5A**). When we varied the effective coat line tension,  $\lambda_{eff}$  (**Figure 5B**), we  
 550 observed that for large values of the effective line tension, the shape of the intermediate tends  
 551 to the complete bud ( $\eta = 1$ ), but a transition to long pearled shapes is not promoted. In strong  
 552 contrast, the COPII coat binding energy,  $\mu_c^0$ , does play an important role in controlling the  
 553 elongation of the carriers, since our results (**Figure 5C**) show that increasing this value leads to  
 554 a sharp transition from shallow buds (**Figure 5C**, top panel, solid blue line) to shallow pearled  
 555 tubes (**Figure 5C**, top panel, solid orange line). Similarly, the application of a force directed  
 556 towards the cytosol at the tip of the growing intermediate also leads to the transition from a  
 557 shallow bud to a pearled tube (**Figure 5D**).  
 558

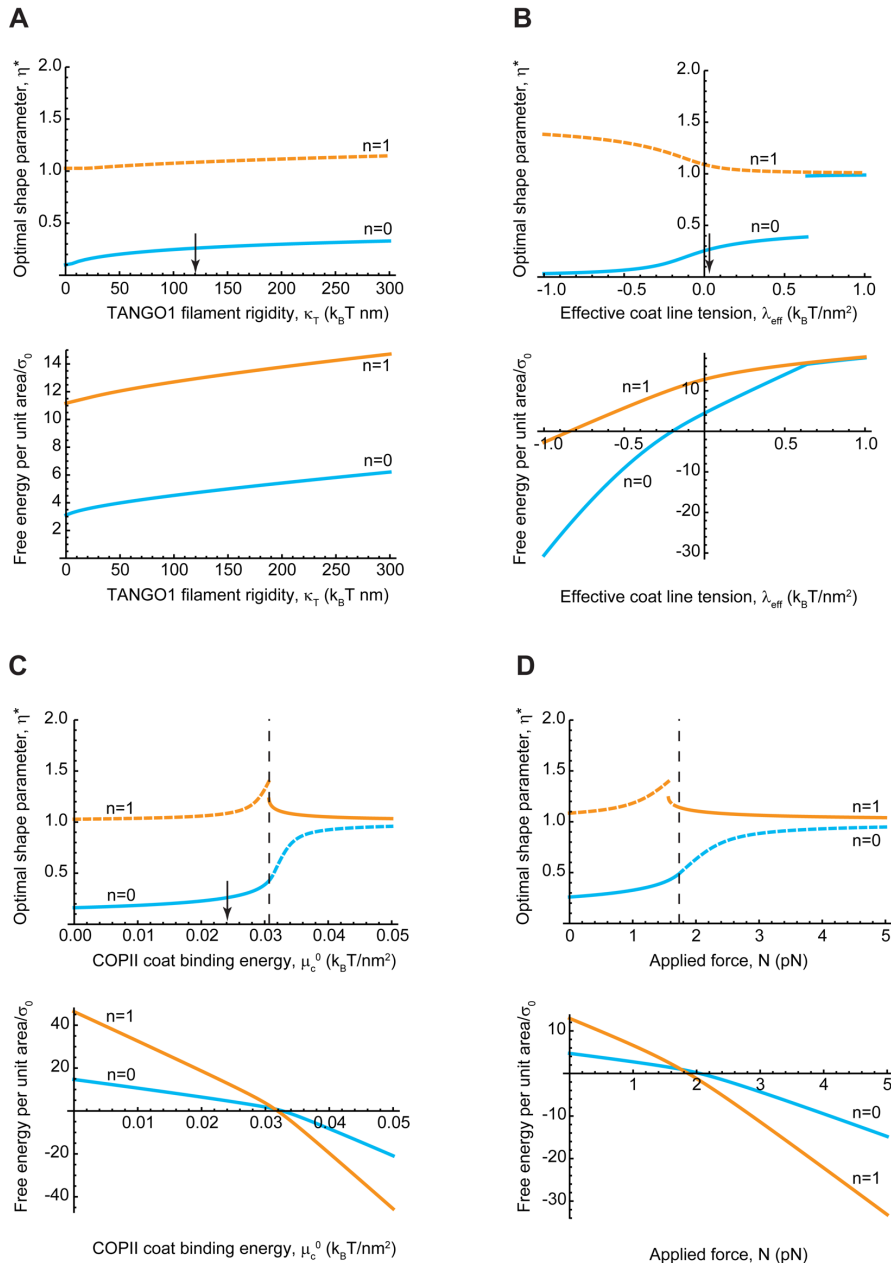

559  
 560  
 561  
 562  
 563  
 564  
 565

**Figure 5. Shapes of the transport intermediates as a function of the different elastic parameters of the model.**

(A) The optimal shape parameter,  $\eta^*$  (top graph), and the corresponding normalized free energy per unit area,  $f_c/\sigma_0$  (bottom graph) are plotted as a function of the TANGO1 filament bending rigidity,  $\kappa_T$ , for incomplete buds ( $n = 0$ , blue curves) and for a long carrier consisting of one pearl and an incomplete bud



566 ( $n = 1$ , orange curves). For this range of parameters the long carriers are of a higher energy than the  
 567 incomplete buds, and hence they are metastable configurations (denoted by the dashed line in the top  
 568 graph). **(B)** The optimal shape parameter,  $\eta^*$  (top graph), and the corresponding normalized free energy  
 569 per unit area,  $f_c/\sigma_0$  (bottom graph) are plotted as a function of the effective coat line tension,  $\lambda_{eff}$ , for  
 570 incomplete buds ( $n = 0$ , blue curves) and for a long carrier consisting of one pearl and an incomplete bud  
 571 ( $n = 1$ , orange curves). For this range of parameters, the long carriers are of a higher energy than the  
 572 incomplete buds, and hence they are metastable configurations (denoted by the dashed line in the top  
 573 graph). **(C)** The optimal shape parameter,  $\eta^*$  (top graph), and the corresponding normalized free energy  
 574 per unit area,  $f_c/\sigma_0$  (bottom graph) are plotted as a function of the COPII coat binding energy,  $\mu_c^0$ , for  
 575 incomplete buds ( $n = 0$ , blue curves) and for a long carrier consisting of one pearl and an incomplete bud  
 576 ( $n = 1$ , orange curves). For this range of parameters, we observe a stability transition from incomplete  
 577 buds to long carriers (denoted by the vertical black dashed line). In the top graph, we denote by solid and  
 578 dashed lines in the top graph the stable and metastable configurations, respectively. **(D)** The optimal  
 579 shape parameter,  $\eta^*$  (top graph), and the corresponding normalized free energy per unit area,  $f_c/\sigma_0$  (bot-  
 580 tom graph) are plotted as a function of the applied force,  $N$ , for incomplete buds ( $n = 0$ , blue curves) and  
 581 for a long carrier consisting of one pearl and an incomplete bud ( $n = 1$ , orange curves). For this range of  
 582 parameters, we observe a stability transition from incomplete buds to long carriers (denoted by the vertical  
 583 black dashed line). In the top graph, we denote by solid and dashed lines in the top graph the stable and  
 584 metastable configurations, respectively. The elastic parameters used for all the calculations shown in **(A-  
 585 D)** are specified in **Table 1**. Arrows in panels **(A-C)** indicate the standard parameters used to compute the  
 586 complementary panels.

587

588

589 Next, we computed the transition zones as a function of the different parameters of the model  
 590 (**Figure 6**). A three-dimensional phase diagram, shown in **Figure 6A**, indicates the transitions  
 591 from single incomplete buds to pearled tubes as a function of three parameters: the COPII coat  
 592 binding energy,  $\mu_c^0$ ; the applied force,  $N$ ; and the membrane tension,  $\sigma$ . Remarkably, based on  
 593 **Equation (6)**, we can have a good analytical estimate of this transition zone, by considering the  
 594 step-wise increase of the free energy (see Materials and methods), as

595

$$596 \quad \mu_c^0 - 2 \frac{\kappa_b}{R^2} + \frac{N}{2\pi R} - \sigma_0 + \Delta\sigma = 0, \quad (7)$$

597

598 which allows us to define a critical force  $N^* = 2\pi R \left( \sigma_0 - \Delta\sigma - \mu_c^0 + 2 \frac{\kappa_b}{R^2} \right)$ ; a critical coat  
 599 binding energy,  $\mu_c^{0*} = \sigma_0 - \Delta\sigma + 2 \frac{\kappa_b}{R^2} - \frac{N}{2\pi R}$ ; and a critical tension reduction,  $\Delta\sigma^* = \sigma_0 -$   
 600  $\mu_c^0 + 2 \frac{\kappa_b}{R^2} - \frac{N}{2\pi R}$ ; above each of which the pearling transition is triggered. Taking the known  
 601 or estimated parameters for the standard membrane tension of the ER,  $\sigma_0 = 0.003 k_B T/nm^2$   
 602 (Upadhyaya and Sheetz, 2004); for the membrane bending rigidity,  $\kappa_b = 20 k_B T$  (Niggemann,  
 603 Kummrow and Helfrich, 1995); and for the size of the standard spherical COPII vesicle,  $R =$   
 604  $37.5 nm$  (Miller and Schekman, 2013); we get  $\Delta\sigma^* = 0.031 k_B T/nm^2 - \mu_c^0$ , at zero force  
 605 ( $N = 0$ ); and  $N^* = 7.4 pN - \mu_c^0 / 0.0042 k_B T/nm^2$  at no membrane tension reduction  
 606 ( $\Delta\sigma = 0$ ) (see **Figure 6E**).

607

608 Taken together, the results we obtained from our physical model of large transport intermediate  
 609 formation reinforce the notion that TANGO1 rings serve to control the growth of COPII carriers.  
 610 TANGO1 rings can stabilize the COPII bud neck and thus prevent their premature closure  
 611 by kinetically arresting or slowing down the completion of a spherical carrier. In such a situa-  
 612 tion, carrier expansion –according to the results of our model– can proceed via three different  
 613 scenarios: (i) increase in the binding affinity of COPII coats to the membrane (**Figure 5C** and

614 **Figure 6**); (ii) appearance of a directed force applied at the growing carrier and pointing to-  
 615 wards the cytosol (**Figure 5D** and **Figure 6**); and (iii) local reduction of the membrane tension  
 616 (**Figure 6**). TANGO1 can directly or indirectly control each of these possibilities (Ma and  
 617 Goldberg, 2016; Raote *et al.*, 2018). Interestingly, the TANGO1 ring properties, such as the  
 618 linactant power of TANGO1 or the TANGO1 filament bending rigidity, are not drivers of the  
 619 incomplete bud to long transport intermediate transition (**Figure 6C,D**), but they seem to act  
 620 more as kinetic controllers of the transition by preventing bud closure (**Figure 4**).  
 621

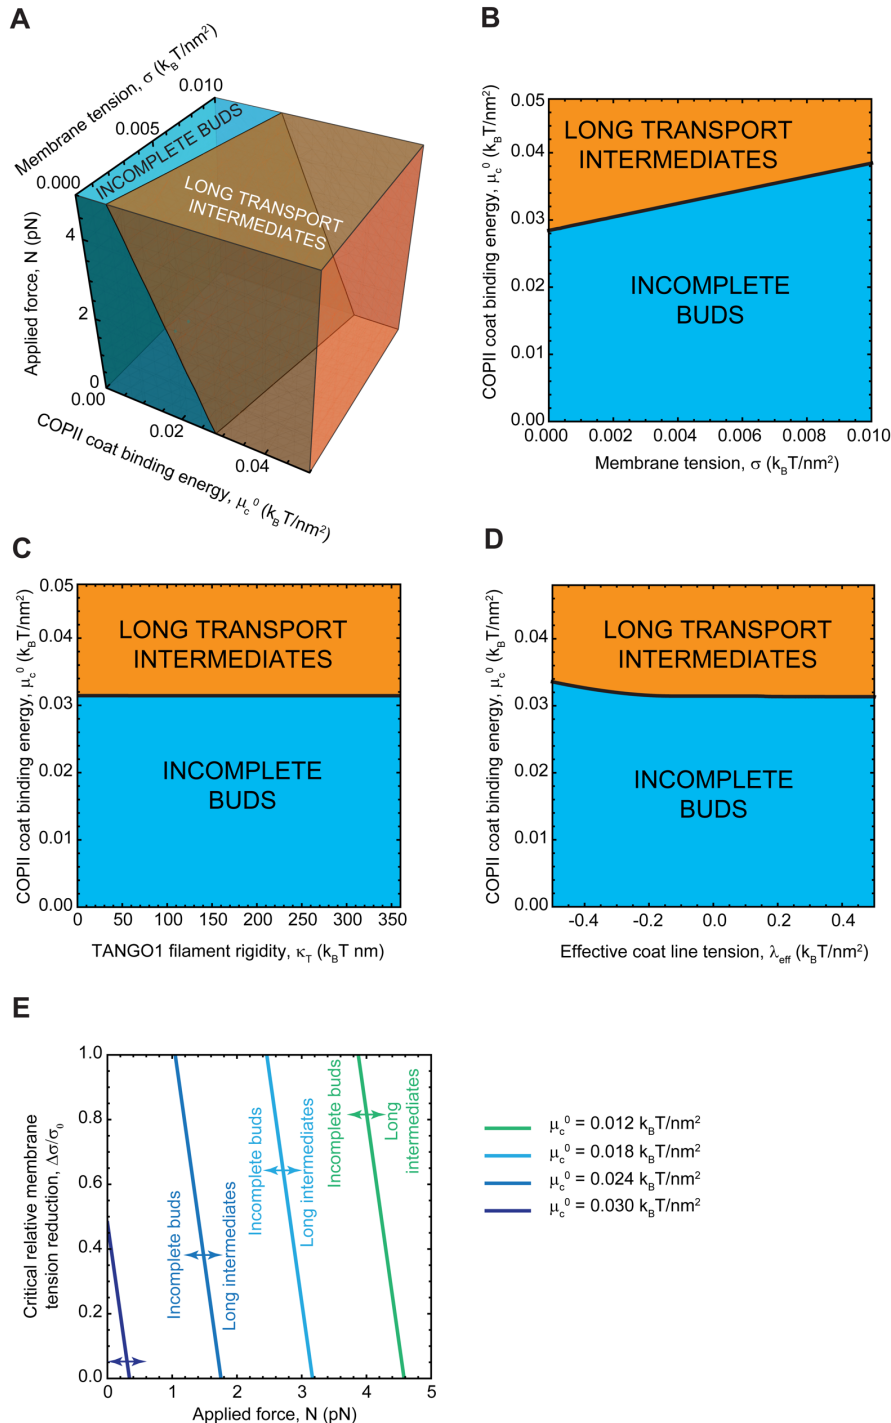

622  
 623  
 624  
 625

**Figure 6. Shape diagram of the transport intermediate as a function of the TANGO1-controlled elastic parameters.**

626 (A) Three-dimensional shape diagram indicating the shape of minimal elastic energy as a function of the  
627 COPII coat binding energy,  $\mu_c^0$ , of the membrane tension,  $\sigma$ , and of the applied force,  $N$ . The region where  
628 incomplete buds correspond to the stable carrier shape is shaded in blue, whereas the region where long  
629 carriers ( $n > 0$ ) correspond to the stable shapes is shaded in orange. (B) Two-dimensional cross-section  
630 of the shape diagram shown in (A) for vanishing applied force ( $N = 0$ ). (C) Two-dimensional shape dia-  
631 gram as a function of the COPII coat binding energy,  $\mu_c^0$ , and of the TANGO1 filament rigidity,  $\kappa_T$ , for  
632 vanishing applied force ( $N = 0$ ) and a standard membrane tension,  $\sigma = \sigma_0 = 0.003 k_B T nm$ . (D) Two-di-  
633 mensional shape diagram as a function of the COPII coat binding energy,  $\mu_c^0$ , and of the effective coat  
634 line tension,  $\lambda_{eff}$ , for vanishing applied force ( $N = 0$ ) and a standard membrane tension,  $\sigma = \sigma_0 =$   
635  $0.003 k_B T nm$ . (E) The critical relative membrane tension reduction,  $\Delta\sigma/\sigma_0$ , above which the incomplete  
636 bud-to-long carrier transition is triggered, is plotted as a function of the applied force,  $N$ , for different values  
637 of the COPII coat binding energy,  $\mu_c^0$  (green-to-blue color-coded curves). Unless specified, the elastic pa-  
638 rameters used for all the calculations shown in (A-E) are listed in **Table 1**.

639

640

### 641 **Proposal of experimental approaches to test our model**

642 In this article, we proposed and analyzed a theoretical model to understand how TANGO1  
643 molecules assemble into functional rings at the ERES, and how these rings can control the  
644 shape of transport intermediates. Our theoretical results will open up new avenues for experi-  
645 mental research on this topic and provide a common framework within which data and results  
646 can be understood. In particular, we envision that our work will stimulate future experimental  
647 efforts to test the proposed mechanisms of TANGO1-mediated ERES organization and colla-  
648 gen export. We propose here some possible routes by which the hypotheses and predictions of  
649 our model as well as some of the open questions it raised could be experimentally tested.

650

651 *Does TANGO1 form a linear or quasi-linear filament held together by lateral protein-protein*  
652 *interactions?* A first step to address this question will be to resolve the stoichiometry of the  
653 TANGO1 family proteins within a TANGO1 ring. Controlled photobleaching of the single-  
654 labeled, endogenously-expressed proteins (Lee *et al.*, 2012), would allow the recording of the  
655 number and spatial positions of single fluorophores in individual TANGO1 rings. These results,  
656 after complete quantitative reconstruction of all the single molecule signals, should provide an  
657 absolute stoichiometry and ultra-resolved structure of TANGO1 organization in the ERES. Ul-  
658 timately, *in vitro* reconstitution of TANGO1 ring formation in synthetic lipid bilayers by using  
659 recombinant proteins will be of paramount importance to experimentally observe the formation  
660 of TANGO1 filaments, assess the minimal components required for their formation, and even-  
661 tually measure the elastic properties of a TANGO1 filament.

662

663 *Is tension homeostasis, controlled by TANGO1-directed fusion of incoming ERGIC mem-*  
664 *branes, a mechanism for transport intermediate formation?* Future efforts in applying cutting-  
665 edge, super-resolution multicolor live-cell microscopy (Bottanelli *et al.*, 2016; Ito, Uemura and  
666 Nakano, 2018; Liu *et al.*, 2018; Schroeder *et al.*, 2019) will help monitor the fusion of ERGIC  
667 membranes to the ER and couple these events to the formation of procollagen-containing  
668 transport intermediates.

669

670 *What can be the origin of the outwards-directed force driving transport intermediate elonga-*  
671 *tion?* It has been shown that procollagen export from the ER does not require the presence of  
672 an intact microtubule network (McCaughey *et al.*, 2019), however the involvement of other  
673 force-producing agents, such as actin-myosin networks, remains unknown. The identification  
674 of physiologically meaningful interactors of TANGO1 by proximity-dependent labeling assays,  
675 such as BioID (Roux *et al.*, 2018), and the subsequent screening for candidates that can exert

676 those forces would set the grounds to identify possible molecular players involved in force-  
677 generation.

678

679 *Finally, what is the shape of the transport intermediate that shuttles collagens from the ER to*  
680 *the ERGIC/Golgi complex?* To this end, three-dimensional, multicolor super-resolution micros-  
681 copy techniques, such as 3D single molecule localization microscopy (3D-SMLM) or 3D stim-  
682 ulated emission depletion (3D-STED) microscopy, could provide sufficient resolution to map  
683 the three-dimensional morphology of the transport intermediates. Recent efforts by using 3D-  
684 SMLM and correlative light and electron microscopy (CLEM) have revealed the existence of  
685 large procollagen-containing structures (Gorur *et al.*, 2017; Yuan *et al.*, 2018). However, fur-  
686 ther work is needed to ascertain if these structures are indeed transport-competent carriers. By  
687 contrast, direct transport of procollagen between the ER and the Golgi complex by a short-loop  
688 pathway in the absence of large vesicles has been recently proposed (McCaughey *et al.*, 2019),  
689 opening to the possibility of a direct tunneling mechanism for trafficking proteins between  
690 compartments (Raote and Malhotra, 2019). Eventually, the use of modern electron microscopy  
691 techniques such as cryo-electron tomography (Beck and Baumeister, 2016) or focused ion  
692 beam-scanning electron microscopy (FIB-SEM) (Nixon-Abell *et al.*, 2016) will help solve this  
693 issue on the morphology of the transport intermediates that shuttle procollagens from the ER to  
694 the Golgi complex.

695

#### 696 **TANGO1 as a regulator of membrane tension homeostasis**

697 We previously showed that TANGO1 forms circular ring-like structures at ERES surrounding  
698 COPII components (Raote *et al.*, 2017). We also revealed the interactions that are required for  
699 TANGO1 ring formation, which are also important to control TANGO1-mediated procollagen  
700 export from the ER (Raote *et al.*, 2018). However, it still remained unclear whether and how  
701 TANGO1 rings could organize and coordinate the budding machinery for efficient procollagen-  
702 export. Here, we proposed, described, and analyzed a feasible biophysical mechanism of how  
703 TANGO1 mediates the formation of procollagen-containing transport intermediates at the ER.  
704 The general idea backed by the results of our model is that TANGO1 rings serve as stabilizers  
705 of small buds, preventing the premature formation of standard COPII coats. TANGO1 is ubiq-  
706 uitously expressed in mammalian cells, including cells that secrete very low amounts of colla-  
707 gen. Furthermore, TANGO1 resides in most ERES in all these different cell lines, yet small  
708 COPII-coated vesicles form normally in those sites. How can this be understood? We propose  
709 that the ability of TANGO1 to form rings around COPII subunits is a first requirement for  
710 TANGO1 to promote procollagen export in non-standard COPII vesicles. Accumulations of  
711 export-competent procollagen at the ERES could re-organize the TANGO1 molecules laying  
712 there into functional rings surrounding COPII components and kinetically preventing the for-  
713 mation of small COPII carriers. Tethering of ERGIC53-containing vesicles mediated by the  
714 TANGO1 TEER domain (Raote *et al.*, 2018) could be the trigger to allow for carrier growth.  
715 Importantly, the ER-specific SNARE protein Syntaxin18 and the SNARE regulator SLY1,  
716 which together trigger membrane fusion at the ER, are also required for procollagen export in  
717 a TANGO1-dependent manner (Nogueira *et al.*, 2014). Fusion of ERGIC membranes to the  
718 sites of procollagen export would lead to a local and transient reduction of the membrane ten-  
719 sion, which can promote, according to our theoretical results, the growth of the COPII carrier.  
720 In this scenario, TANGO1 would act as a regulator of membrane tension homeostasis to control  
721 procollagen export at the ERES. In parallel, we can also foresee a situation by which TANGO1  
722 rings help pushing procollagen molecules into the growing carrier and couple this pushing force  
723 to procollagen folding, through the chaperone HSP47 (**Figure 3**). This pushing force, according

724 to our model, would also promote the formation of a large intermediate and hence TANGO1  
725 could act as a sensor of procollagen folding to couple it with the export machinery.

726 What controls the organelle size in the context of intracellular trafficking? There has been a lot  
727 of work on what set the size of organisms, the size of tissues in an organism, and the size of  
728 cells in a tissue. However there has been relatively less work on the question of what sets the  
729 size of organelles relative to the cell. Extensive cargo transfer while trafficking bulky cargoes  
730 such as collagens leads to large amounts of membrane being transferred from organelle to or-  
731 ganelle. To maintain organellar homeostasis, loss of membrane from a compartment has to be  
732 concomitantly compensated by membrane acquisition from the biosynthetic pathway or by traf-  
733 ficking from other organelles; the arrival and departure of membrane at each compartment has  
734 to be efficiently balanced. How is this homeostatic balance controlled? Changes in membrane  
735 tension have been described to affect rates of exocytosis and endocytosis at the plasma mem-  
736 brane (Apodaca, 2002; Kosmalka *et al.*, 2015; Wu *et al.*, 2017). Interestingly, a theoretical  
737 model has also established a crucial role for membrane tension in modulation the transition to  
738 bud clathrin-coated vesicles (Hassinger *et al.*, 2017). However, control of endomembrane traf-  
739 ficking by membrane tension is more challenging to study experimentally and hence still re-  
740 mains poorly understood. We propose that TANGO1 serves as a hub in the ER to connect  
741 different organelles for the intracellular traffic by controlling the tension homeostasis and reg-  
742 ulating the membrane flux balance between these organelles.

743

744 In summary, we proposed a theoretical mechanical model that explains how TANGO1 mole-  
745 cules form functional rings at ERES, and how these TANGO1 rings assemble the machinery  
746 required to form a large transport intermediate commensurate to the size of procollagens. We  
747 envision that our hypotheses and the predictions of our model will open up new lines of exper-  
748 imental research to help understand how COPII coats organize together with proteins of the  
749 TANGO1 family to allow for the export of folded procollagen out of the ER.

## 750 MATERIALS AND METHODS

### 751 752 DETAILED DESCRIPTION OF THE PHYSICAL MODEL OF TANGO1 RING 753 FORMATION

754 TANGO1 filaments are described by their physical length,  $L_T$ , which is proportional to the  
755 number of protein monomers forming the filament; and by their persistence length,  $\xi_p =$   
756  $\kappa_T/k_B T$ ,—where  $\kappa_T$  is the filament bending rigidity and  $k_B T$  is the thermal energy, equal to the  
757 Boltzmann constant times the absolute temperature (Doi and Edwards, 1986)—, which describes  
758 how stiff the filament is. As long as the filament length is not much larger than the persistence  
759 length, the bending energy of the TANGO1 filament can be expressed as  $F_{bend} =$   
760  $\frac{\kappa_T}{2} \int_{L_T} (c - c_0)^2 dl$ , where  $c$  and  $c_0$  are the actual and spontaneous curvature of the filament, re-  
761 spectively, and the integral is performed over the entire filament length. We define positive  
762 spontaneous curvatures of the filament as those where the TANGO1-COPII interacting do-  
763 mains lie on the concave side of the filament, and negative when they lie on the convex side.  
764 For a system of  $n$  circular domains of radius  $R$ , the filament bending energy can be written as  
765

$$766 F_{bend} = n\pi\kappa_T\omega R(1/R - c_0)^2, \quad (\text{M1})$$

767  
768 where we assumed that any existing filaments not adsorbed to the COPII patches adopt the  
769 preferred curvature, and where  $\omega$  is the wetting fraction: the fraction of domain boundary  
770 length covered (“wetted”) by TANGO1 molecules. The chemical potentials of free (not fila-  
771 ment-associated) and of bound (filament-forming) TANGO1 proteins are, respectively,  $\mu_f =$   
772  $\mu_f^0 + k_B T \log c_f$ , and  $\mu_b = \mu_b^0$ . Here,  $\mu_f^0$  and  $\mu_b^0$  are the standard chemical potentials,  
773 which include the enthalpic contributions to the free energy per molecule, and define the energy  
774 of monomer binding to the filament,  $\varepsilon_b = \mu_b^0 - \mu_f^0 < 0$ ; and the logarithmic term takes into  
775 account the contribution of the translational entropy. In addition, transient breakage of the fil-  
776 ament (either stochastic or assisted) exposes free filament ends, which carry an extra energy  
777 due to the unsatisfied bonds, each of which contributes with an amount equal to  $\varepsilon_b$ . In principle  
778 this filament free-end energy could be different for each of the members of the TANGO1 fam-  
779 ily, however, for the sake of simplicity, we consider them all to be equivalent to each other. We  
780 will only need to take into account this energy term when considering interactions between  
781 neighboring rings, which involve a partial breakage of otherwise closed filaments (see Appen-  
782 dix 1).

783  
784 Second, the effect of COPII polymerization on the ER membrane has two contributions on the  
785 total free energy of the system: the first one is through the line tension,  $\lambda_0$ , of a COPII-coated  
786 membrane patch; and the second one is associated to the chemical potential of COPII polymer-  
787 ization,  $\mu_0$ . The line energy of such a domain can be expressed as  $F_{line} = \lambda_0 L$ , where  $L$  is the  
788 domain length. We allow for the possibility that TANGO1 proteins, upon adsorbing to the  
789 boundary of the COPII domains by binding the most external subunits, effectively decrease the  
790 line tension of the COPII domain to a new value  $\lambda' = \lambda_0(1 - \Delta\lambda/\lambda_0)$ , where  $\Delta\lambda/\lambda_0$  is the rel-  
791 ative decrease in the line tension, a measure of the linactant power of TANGO1. Altogether,  
792 we can write the line energy term as

$$794 F_{line} = \lambda_0 \left(1 - \frac{\Delta\lambda}{\lambda_0} \omega\right) L. \quad (\text{M2})$$

795

796 If the system is composed of  $n$  circular domains of radius  $R$ , covering a total ERES surface  
797 area of  $A_{ERES} = \pi n R^2$ , then the total boundary length is  $L = 2\pi n R$ . The free energy term con-  
798 tributed by the chemical potential of polymerization is

799

$$800 \quad F_{pol} = -\mu_0 A_{ERES}, \quad (\text{M3})$$

801

802 which describes, by classical nucleation theory, a minimum ERES size,  $R_{min} = \lambda' / \mu_0$ , above  
803 which the polymerizing domain is stable and can dynamically grow (Frolov *et al.*, 2006).

804

805 And third, we need to include an extra energy term,  $F_{phen}$ , which includes all the factors that  
806 modulate the domain size distribution, including the aforesaid chemical potential of COPII  
807 polymerization (Heinzer *et al.*, 2008). This phenomenological free energy term,  $F_{phen}$ , should  
808 have a local minimum at certain domain size,  $R_0(\omega)$ , which could in principle change by the  
809 presence of TANGO1 and hence depend on the wetting fraction,  $\omega$ . For the sake of simplicity,  
810 we will disregard this dependence, and consider  $R_0$  as a free parameter in our model. Hence,  
811 we can approximately express this free energy as a phenomenological free energy term for a  
812 system of  $n$  domains as a second order series expansion around this minimum as

813

$$814 \quad F_{phen} = \frac{1}{2} f_0 (R - R_0)^2 A_{ERES}, \quad (\text{M4})$$

815

816 where  $f_0$  is a coupling factor that dictates the strength of the phenomenological free energy  
817 with respect to the rest of factors the overall system free energy. Notice that we decoupled the  
818 line energy of the domain, Eq. (M2), from this phenomenological energy. This phenomenolog-  
819 ical approach is in some aspects akin to the Ginzburg-Landau theory of phase transitions (Foret,  
820 2005; Wolff, Komura and Andelman, 2015; Schmid, 2017), where a phenomenological free  
821 energy is proposed as a function of an order parameter, which plays the role of the local con-  
822 centration of coat subunits on the membrane, and includes a homogeneous term (usually a bi-  
823 stable potential), which plays the role of our  $F_{phen}$ , **Equation (M4)**; and a gradient penalty,  
824 which plays the role of the line energy, **Equation (M2)**.

825

826 The effects of other known players, such as the complex spatiotemporal dynamics of ERES  
827 components, the recruitment of ERGIC53-positive membranes by TANGO1, and the recruit-  
828 ment of procollagen are implicitly considered through effective parameters of the model. Ad-  
829 ditionally, one should in principle also consider the translational free energy of the filament  
830 components, which is larger for filaments wetting ERES than for free filaments. However, this  
831 contribution is relatively minor compared to the rest of contributions to the free energy and  
832 hence we disregard it in our formal analysis of the system free energy.

833

834 In total, the extensive free energy of the system,  $F$ , is the addition of the different free energy  
835 terms in **Equations (M1–M4)**,

836

$$837 \quad F = F_{bend} + F_{line} + F_{pol} + F_{phen}. \quad (\text{M5})$$

838

839 Disregarding the constant term coming from the polymerization free energy,  $F_{pol}$ , we end up  
840 getting the expression shown in the main text **Equation (1)**.

841

842

843 **DETAILED DESCRIPTION OF THE PHYSICAL MODEL OF TANGO1-DEPENDENT**  
 844 **TRANSPORT INTERMEDIATE FORMATION**

845 Here we present the detailed description and derivation, as well as the mathematical formalism  
 846 of the analysis of the physical model of TANGO1-dependent transport intermediate formation  
 847 presented in the main text. Our model builds on a previously presented mechanical model for  
 848 clathrin-coated vesicle formation (Saleem *et al.*, 2015), which we extended to allow for the  
 849 growth of larger transport intermediates by incorporating (i) the effects of TANGO1 rings on  
 850 COPII coats; (ii) the reduction of the membrane tension by the tethering and fusion of  
 851 ERGIC53-containing membranes; and (iii) an outward-directed force (**Figure S3A**).

852

853 Analogously to the clathrin vesicle model by Saleem et al. (Saleem *et al.*, 2015), we consider  
 854 that the free energy per unit area of coat polymerization onto the membrane,  $\mu_c$ , has a bipartite  
 855 contribution arising from the positive free energy of COPII binding to the membrane,  $\mu_c^0$ , and  
 856 from the negative contribution of membrane deformation by bending, so  $\mu_c = \mu_c^0 - 2\frac{\kappa_b}{R^2}$ ,  
 857 where  $\kappa_b$  is the bending rigidity of the lipid bilayer, and  $R$  is the radius of curvature imposed  
 858 by the polymerized COPII coat. An additional term associated to the possible elastic defor-  
 859 mation of the COPII coat could be considered as  $\mu_{coat,bend} = -\frac{1}{2}\kappa_{coat}\left(\frac{2}{R} - \frac{2}{R_{coat}}\right)^2$ , where  
 860  $\kappa_{coat}$  is the coat rigidity and  $R_{coat}$  is the spontaneous radius of curvature of the coat (Iglič,  
 861 Slivnik and Kralj-Iglič, 2007; Boucrot *et al.*, 2012). However, we assume that the coat is con-  
 862 siderably more rigid than the membrane,  $\kappa_{coat} \gg \kappa_b$ , so there is no coat deformation and  $R =$   
 863  $R_{coat}$ . Hence, the free energy per unit area of the initially undeformed membrane due to COPII  
 864 polymerization,  $f_{coat}$ , can be expressed as

865

$$866 \quad f_{coat} = \frac{-\mu_c A_c}{A_p}, \quad (M6)$$

867

868 where  $A_c$  is the surface area of the membrane covered by the COPII coat, and  $A_p$  is the pro-  
 869 jected area of the carrier, that is, the area of the initially undeformed membrane under the carrier  
 870 (**Figure S3B**). In contrast to our previous analysis of the two-dimensional scenario of TANGO1  
 871 ring formation, here we consider the bending of the membrane away from the initially flat  
 872 structure, and so we do not consider the phenomenological term of ERES size, **Equation (M4)**,  
 873 but rather the free energy associated to coat polymerization, **Equation (M6)**.

874

875 We also consider a line energy for the coat subunits laying at the edge of the polymerizing  
 876 structure. This line energy per unit area reads as

877

$$878 \quad f_{line} = \lambda(\omega) \frac{l}{A_p}, \quad (M7)$$

879

880 where  $\lambda(\omega) = \lambda_0 - \omega \Delta\lambda$  is the line tension, consisting on the line tension of the bare coat,  $\lambda_0$ ,  
 881 and  $\Delta\lambda$  is the line tension reduction associated with the TANGO1-filament wetting; and  $l =$   
 882  $2\pi\rho$  is the length of the carrier edge, associated to the opening radius at the base of the carrier,  
 883  $\rho$  (**Figure S3B**).

884

885 Next, we consider the effect of the membrane tension. We consider that the membrane is ini-  
 886 tially under a certain tension,  $\sigma_0$ , and it can get a local decrease in tension,  $\Delta\sigma$ , by the fusion of



887 incoming ERGIC53-containing membranes. Hence, the actual membrane tension at a given  
888 moment is  $\sigma = \sigma_0 - \Delta\sigma$ . We can estimate that  $\Delta\sigma = K_s m A_{ERGIC}$ , where  $K_s$  is the stretching  
889 coefficient of the membrane, and  $A_{ERGIC}$  is the surface area of each of the  $m$  ERGIC53-  
890 containing vesicles that fuse to the budding site (Sens and Turner, 2006). Hence, the tension  
891 associated free energy per unit area reads,

892

$$893 \quad f_{tension} = (\sigma_0 - \Delta\sigma) \frac{A_m}{A_p}, \quad (\text{M8})$$

894

895 where  $A_m$  is the surface area of the entire membrane after deformation.

896

897 Next, we consider the contribution of the TANGO1 filament into the free energy of the system.  
898 Analogously to our discussion for the free energy of coat binding to the membrane, **Equation**  
899 **(M6)**, we can write this free energy per unit area as

900

$$901 \quad f_T = -\frac{\mu_T l_T}{A_p}, \quad (\text{M9})$$

902

903 where  $\mu_T = \mu_T^0 - \frac{\kappa_T}{2} \left( \frac{1}{R_T} - c_0^T \right)^2$  includes the contributions of the filament assembly energy,  
904  $\mu_T^0$ , and of the filament bending energy as explained in the ring formation model, where  $\kappa_T$  is  
905 the filament bending rigidity,  $R_T$  is the ring radius, and  $c_0^T$  is the preferred filament curvature.  
906 Under conditions of full wetting of the TANGO1 filament, the size of the ring radius equals to  
907 the size of the coat opening, that is  $R_T = \rho$ . We want to stress that the bending energy penalty  
908 of the filament diverges when the bud approaches closure, meaning that either there is partial  
909 dewetting of the TANGO1 filament from the edge of the COPII coat at narrow necks or the  
910 shape transition of the carrier goes through intermediate shapes with a relatively large bud neck,  
911 such as Delaunay shapes (e.g. unduloids) (Naito and Ou-Yang, 1997).

912

913 Finally, the mechanical work performed by the outward-directed force,  $N$ , is also included in  
914 the free energy of the system, as

915

$$916 \quad f_f = -\frac{N h}{A_p}, \quad (\text{M10})$$

917

918 where  $h$  is the length of the carrier (**Figure S3B**). At this stage, we disregard the effects of the  
919 growth-shrinkage dynamics of the polymerizing COPII lattice, as included in our formal anal-  
920 ysis of TANGO1 ring size through the phenomenological term in the free energy, **Equation**  
921 **(M4)**. Hence, the total free energy of the carrier per unit area,  $f_c$ , is the sum of all these contri-  
922 butions **Equations (M6-10)**,

923

924

$$925 \quad f_c = f_{coat} + f_{line} + f_{tension} + f_T + f_f, \quad (\text{M11})$$

926

927 which is presented in **Equation (5)** in the main text.

928

### 929 **Geometry of the problem**

930

931 Based on the proposed geometries for the growing carrier we can distinguish three geometries,  
depending on how complete the transport intermediate is: shallow buds, deep buds, and pearled

932 intermediates (**Figure S3B**, panels (i) to (iii), respectively). These shapes will allow us to cal-  
 933 culate as a function of the carrier morphology the geometric parameters that enter in **Equation**  
 934 **(5)**, namely, the area of the coat,  $A_c$ , the area of the membrane,  $A_m$ , the projected area,  $A_p$ , and  
 935 the length of the coat rim,  $l$  (Saleem *et al.*, 2015). A convenient quantity to parametrize the  
 936 shape of the carrier is the height of the carrier,  $h$ , which we will use in a dimensionless manner  
 937 by normalizing it to the diameter of the spherical bud,  $\eta = h/2R$ .

938  
 939 (i) *Shallow bud*. For a shallow bud (**Figure S4B(i)**), which corresponds to buds smaller than a  
 940 hemisphere, we can write that  $A_c = A_m = 2\pi R^2 (1 - \cos \theta)$ , where  $0 < \theta < \pi/2$  is the open-  
 941 ing angle of the bud (see **Figure S3B(i)**). In addition,  $A_p = \pi \rho^2 = \pi R^2 \sin^2 \theta$ ; and  $h =$   
 942  $R(1 - \cos \theta)$ . Expressing these quantities as a function of the shape parameter,  $\eta$ , we obtain

$$944 \quad A_c = A_m = 4\pi R^2 \eta : \eta < \frac{1}{2}, \quad (\text{M12})$$

$$945 \quad A_p = 4\pi R^2 \eta (1 - \eta) : \eta < \frac{1}{2}, \quad (\text{M13})$$

$$946 \quad \rho = 2R\sqrt{\eta(1 - \eta)} : \eta < \frac{1}{2}. \quad (\text{M14})$$

947  
 948 (ii) *Deep bud*. For a deep bud (**Figure S3B(ii)**), which corresponds to buds larger than a hemi-  
 949 sphere, we can write that  $A_c = 2\pi R^2 (1 - \cos \theta)$ , where  $\pi/2 < \theta < \pi$ . In addition,  $A_m =$   
 950  $\pi R^2 (1 + (1 - \cos \theta)^2)$ ;  $A_p = \pi R^2$ ; and  $h = R(1 - \cos \theta)$ . Expressing these quantities as a  
 951 function of the shape parameter,  $\eta$ , which in this case ranges between  $\frac{1}{2} < \eta < 1$ , we obtain

$$953 \quad A_c = 4\pi R^2 \eta : \frac{1}{2} < \eta < 1, \quad (\text{M15})$$

$$954 \quad A_m = \pi R^2 (1 + 4\eta^2) : \frac{1}{2} < \eta < 1, \quad (\text{M16})$$

$$955 \quad A_p = \pi R^2 : \frac{1}{2} < \eta < 1, \quad (\text{M17})$$

$$956 \quad \rho = 2R\sqrt{\eta(1 - \eta)} : \frac{1}{2} < \eta < 1. \quad (\text{M18})$$

957  
 958 (iii) *Pearled intermediate*. A pearled intermediate corresponds to carriers form by an incom-  
 959 plete bud with opening angle  $0 < \theta < \pi$ , connected via a narrow connection with  $n$  complete  
 960 buds (**Figure S3B(iii)**). Here, we can write that  $A_c = 2\pi R^2 [2n + (1 - \cos \theta)]$ , where  $0 <$   
 961  $\theta < \pi$  and  $n \geq 1$ . In addition,  $A_m = \pi R^2 [4n + 1 + (1 - \cos \theta)^2]$ ;  $A_p = \pi R^2$ ; and  $h =$   
 962  $R(2n + 1 - \cos \theta)$ . Expressing these quantities as a function of the shape parameter,  $\eta$ , we  
 963 obtain

$$965 \quad A_c = 4\pi R^2 \eta : \eta > 1, \quad (\text{M19})$$

$$966 \quad A_m = \pi R^2 (1 + 4n + 4(\eta - n)^2) : \eta > 1, \quad (\text{M20})$$

$$967 \quad A_p = \pi R^2 : \eta > 1, \quad (\text{M21})$$

$$968 \quad \rho = 2R\sqrt{(\eta - n) - (\eta - n)^2} : \eta > 1. \quad (\text{M22})$$

970 Putting together **Equations (M12-22)**, we get:

$$972 \quad A_c = 4\pi R^2 \eta \quad (\text{M23})$$

$$973 \quad A_m = \begin{cases} 4\pi R^2 \eta, & \eta < 1/2 \\ \pi R^2 [1 + 4n + 4(\eta - n)^2], & \eta > 1/2 \end{cases} \quad (\text{M24})$$

$$974 \quad A_p = \begin{cases} 4\pi R^2 \eta(1-\eta), & \eta < 1/2 \\ \pi R^2, & \eta > 1/2 \end{cases} \quad (\text{M25})$$

$$975 \quad \rho = 2R\sqrt{(\eta-n) - (\eta-n)^2}. \quad (\text{M26})$$

976

977 where  $n = [\eta]$ , the brackets denoting the integer part operator. This allows us to express *Equa-*  
 978 *tion (5)*, for the case where  $c_0 = 0$  and under full wetting conditions ( $\omega = 1$ ), as

979

$$980 \quad f_c = \frac{\sigma - \tilde{\mu}}{1-\eta} + \frac{\tilde{\lambda}}{\sqrt{\eta(1-\eta)}} + \frac{\tilde{\kappa}_T}{[\eta(1-\eta)]^{3/2}}, \quad \eta < 1/2 \quad (\text{M27})$$

981

$$982 \quad f_c = \sigma[1 + 4n + 4(\eta-n)^2] - 4\tilde{\mu}\eta + 4\tilde{\lambda}\sqrt{(\eta-n)(1-\eta+n)} +$$

$$983 \quad \frac{4\tilde{\kappa}_T}{\sqrt{(\eta-n)(1-\eta+n)}}, \quad \eta > 1/2, \quad (\text{M28})$$

984

985 where  $\tilde{\mu} = \mu_c^0 - 2\frac{\kappa_b}{R^2} + \frac{N}{2\pi R}$ ,  $\tilde{\lambda} = (\lambda_0 - \Delta\lambda - \mu_T^0)/R$ , and  $\tilde{\kappa}_T = \kappa_T/8R^3$ .

986 **ACKNOWLEDGEMENTS**

987 We thank Javier Diego Íñiguez and members of the Garcia-Parajo lab for valuable discussions.  
988 M.F. Garcia-Parajo and V. Malhotra are Institució Catalana de Recerca i Estudis Avançats pro-  
989 fessors at ICFO-Institut de Ciències Fòniques and the Centre for Genomic Regulation (CRG),  
990 respectively. M.F. Garcia-Parajo and F. Campelo acknowledge support by the Spanish Ministry  
991 of Economy and Competitiveness (“Severo Ochoa” Programme for Centres of Excellence in  
992 R&D (SEV-2015-0522), BFU2015-73288-JIN, FIS2015-63550-R and FIS2017-89560-R),  
993 Fundacion Privada Cellex, Generalitat de Catalunya through the CERCA program, ERC Ad-  
994 vanced Grant NANO-MEMEC (GA 788546) and LaserLab 4 Europe (GA 654148). I. Raote  
995 and V. Malhotra acknowledge funding by grants from the Ministerio de Economía, Industria y  
996 Competitividad Plan Nacional (BFU2013-44188-P) and Consolider (CSD2009-00016); sup-  
997 port of the Spanish Ministry of Economy and Competitiveness, through the Programmes “Cen-  
998 tro de Excelencia Severo Ochoa 2013–2017” (SEV-2012–0208) and Maria de Maeztu Units of  
999 Excellence in R and D (MDM-2015–0502); and support of the CERCA Programme/Generalitat  
1000 de Catalunya. All the authors acknowledge support by the BIST Ignite Grant (eTANGO). I.  
1001 Raote acknowledges support from the Spanish Ministry of Science, Innovation and Universities  
1002 (IJCI-2017-34751). This work reflects only the authors’ views, and the EU Community is not  
1003 liable for any use that may be made of the information contained therein.

1004 **TABLE 1: Parameters used in the large transport intermediate formation model.** The free  
 1005 energy *Equation (5)* depends on a number of different elastic and geometric parameters, which  
 1006 are described in this table.

| Parameter       | Description                            | Value                                                             | Notes                                                                                         | Reference                                 |
|-----------------|----------------------------------------|-------------------------------------------------------------------|-----------------------------------------------------------------------------------------------|-------------------------------------------|
| $\sigma_0$      | ER membrane tension                    | $0.003 k_B T / nm^2$                                              |                                                                                               | (Upadhyaya and Sheetz, 2004)              |
| $K_S$           | Stretching modulus of the membrane     | $10^{-8} k_B T / nm^4$                                            |                                                                                               | (Sens and Turner, 2006)                   |
| $m$             | Number of fused vesicles               | 0–4                                                               |                                                                                               | (Raote <i>et al.</i> , 2018)              |
| $A_{ERGIC}$     | Membrane area of the fused vesicle     | $10^3 nm^2$                                                       | Membrane area of an average COPI vesicle                                                      | (Bykov <i>et al.</i> , 2017)              |
| $\lambda_0$     | Bare coat line tension                 | $0.012 k_B T / nm$                                                | Not measured for COPII. Used the clathrin value as a reference                                | (Saleem <i>et al.</i> , 2015)             |
| $\Delta\lambda$ | Linactant TANGO1 effect                | Unknown (varies from 0 to $\lambda_0$ )                           |                                                                                               | -                                         |
| $\mu_c^0$       | COPII coat binding energy              | Variable. The measured value for clathrin is $0.024 k_B T / nm^2$ |                                                                                               | (Saleem <i>et al.</i> , 2015)             |
| $\kappa_b$      | Membrane bending rigidity              | $20 k_B T$                                                        |                                                                                               | (Niggemann, Kummrow and Helfrich, 1995)   |
| $\mu_T^0$       | TANGO1 filament lateral binding energy | $0.15 - 1 k_B T / nm$                                             | Not measured. Range based on standard protein-protein interaction energies ( $5 - 30 k_B T$ ) |                                           |
| $\kappa_T$      | TANGO1 filament bending rigidity       | $120 k_B T nm$                                                    | Not measured. Range based on standard filament rigidities (see text)                          |                                           |
| $c_0^T$         | TANGO1 filament spontaneous curvature  | $(-0.01, 0.01) nm^{-1}$                                           | Not measured.                                                                                 |                                           |
| $N$             | Outwards directed force                | $0 - 5 pN$                                                        | Not measured. Range based                                                                     | (Kovar and Pollard, 2004) (Actin); (Block |

|       |                                       |         |                                |                                             |
|-------|---------------------------------------|---------|--------------------------------|---------------------------------------------|
|       |                                       |         | on known intracellular forces. | <i>et al.</i> , 2003)<br>(Molecular motors) |
| $R$   | Radius of curvature of the COPII coat | 37.5 nm |                                | (Miller and Schekman, 2013)                 |
| $R_T$ | Radius of stationary TANGO1 ring      | 100 nm  |                                | (Raote <i>et al.</i> , 2017)                |

1007

## 1008 APPENDIX 1. Computation of the free energy transitions pro- 1009 moting ring-ring fusion

1010

1011 In the main body of this article, we have considered the situation where TANGO1 filaments  
1012 form circular rings around ERES. However, we previously reported situations where TANGO1  
1013 filaments form other structures rather than circular rings, such as linear or planar arrangements  
1014 of similarly fused rings (Raote *et al.*, 2018). Hence, we decided to exploit our model to compute  
1015 the ability of nearby TANGO1 rings to form fused structures and propose a ring fusion pathway  
1016 consisting on transient filament breakage, partial dewetting, merger to a neighboring filament,  
1017 and final rewetting (*Appendix 1–Figure 1, Figure S4A*). Each of these transitions is character-  
1018 ized by a free energy change (*Appendix 1–Figure 1B, Figure S4B-G*).

1019

1020 To compute the free energy changes leading to ring fusion, we consider, for simplicity, two  
1021 closely apposed TANGO1 rings, separated from each other by a center-to-center distance  $a$   
1022 (see *Figure S1A*). We start by analyzing the partial dewetting of the TANGO1 ring due to  
1023 transient breakage of the TANGO1 filament and partial detachment of a region of the filament  
1024 (given by an angle  $\alpha$ ) from the COPII patch (*Appendix 1–Figure 1A and Figure S4A*), by  
1025 computing the free energy changes of the shape transition. The energy change upon partial  
1026 dewetting of the TANGO1 filament depends on different factors, namely the strength of  
1027 TANGO1-COPII interaction (that is, on  $\overline{\Delta\lambda}$ ), which prevents dewetting; the bending rigidity,  
1028  $\kappa_T$ , and spontaneous curvature,  $c_0$ , of the filament, which generally favor partial dewetting; and  
1029 the free energy of generating new loose filament ends,  $\varepsilon_{free}$ , which prevents dewetting by pe-  
1030 nalyzing filament breakage. Let us now calculate these changes according to our model. In the  
1031 following, we consider only two neighboring ERES of a fixed size,  $R$ , and compute the energy  
1032 changes per ERES, as depicted schematically in *Appendix 1–Figure 1B*.

1033

1034 First, opening of the filament, by the transient, stochastic breakage of a link between two com-  
1035 ponents of the TANGO1 filament, is associated with a free energy change  $\Delta F_{break} = 2\varepsilon_{free}$ .

1036

1037 Second, the free energy of partial dewetting is given then by the expression

1038

$$1039 \quad \Delta F_{dewet}(\alpha) = 2R\alpha[\Delta\lambda - \kappa_T/2(1/R - c_0)^2] + 2\varepsilon_{free}, \quad (\text{A1})$$

1040

1041 where we considered that the portion of the filament that detached from the COPII patch rapidly  
1042 adopts the preferred curvature,  $c_0$ . Since  $\varepsilon_{free} \geq 0$ , such a partial dewetting transition is ener-  
1043 getically unfavorable under the conditions of total wetting of the filament and hence only occurs  
1044 stochastically with a probability proportional to  $e^{-\Delta F_{dewet}(\alpha)/k_B T}$ , following Arrhenius kinet-  
1045 ics.

1046

1047 If there are free TANGO1 monomers or another partially dewetted TANGO1 ring nearby, the  
1048 loose end of one partially dewetted filament can bind the nearby partially dewetted TANGO1  
1049 filament. This transition is characterized by an overall free energy change,  $\Delta F_{fusion}(\alpha)$ , which  
1050 depends on the actual shape of the interconnecting piece of filament between the two rings. To  
1051 obtain an analytically treatable expression for the free energy change upon fusion, we approx-  
1052 imate the shape of this interconnecting filament as a circular line matching the filament ring  
1053 piece wetting the COPII patch (see *Figure S4A*, subpanel (4)). Geometric arguments imply that

1054 the radius of curvature of this interconnecting piece of filament is given by  $R_{int}(\alpha) =$   
 1055  $1/(2 \cos \alpha) - R$ , and the distance to the symmetry axis (see **Figure S4A**, subpanel (4)) by  $\Delta =$   
 1056  $a/2 (\tan \alpha - 1/\cos \alpha) + R$ . If we ignore filament growth during the partial dewetting situa-  
 1057 tion, we can see that fusion is only possible if the two rings are at a distance below a maximal  
 1058 fusion distance  $a_{max}(\alpha) = 2\alpha R$ . Moreover, the condition  $\Delta \geq 0$  leads to a minimum  
 1059 dewetting angle allowing partial ring fusion, given by  $\alpha_{min}(a) = \arcsin\left(\frac{1-4R^2/a^2}{1+4R^2/a^2}\right)$ . In the  
 1060 fused configuration, we search for the partial dewetting angle,  $\alpha_{min} \leq \alpha_{fusion} \leq \pi/2$ , that  
 1061 minimizes the overall free energy change in the system after ring fusion, calculated with respect  
 1062 to the initial total wetting situation,

$$1063 \Delta F_{fusion}(\alpha) = 2R\alpha(\Delta\lambda + \kappa_T/2[(1/R_{int}(\alpha) + c_0)^2 - (1/R - c_0)^2]) + 2\varepsilon_{free}, \quad (\text{A2})$$

1064 which is again positive if we assume the system is in the wetting regime, that is,  $\Delta\lambda \geq$   
 1065  $\kappa_T/2(1/R - c_0)^2$  (see **Figure S4B**). However, the free energy change from the partially  
 1066 dewetted, pre-fusion state intermediate (subpanel (4), **Figure S4A**) to the fused ring situation  
 1067 is given by  $-\Delta F_{break} = -2\varepsilon_{free}$ , which takes negative values and therefore leads to the fused  
 1068 ring geometry to be a metastable configuration. Hence, the stochastic breakage of a link in the  
 1069 TANGO1 filament followed by partial dewetting could, under certain circumstances, be re-  
 1070 solved by the fusion of this open TANGO1 filament with another open TANGO1 filament  
 1071 nearby, thus generating a fused ring configuration.

1072 Finally, since the system is under wetting conditions, once the two filaments have merged, the  
 1073 COPII patches will also tend to fuse and be completely wet by the fused TANGO1 filament  
 1074 (see subpanel (6) in **Appendix 1–Figure 1**). This would normally be a spontaneous process  
 1075 associated with the decrease in the ERES free energy. To have an estimate of this effect, we  
 1076 consider a simple geometry for the fused rings, schematized in **Figure S4A**, subpanel (6), as  
 1077 that of two connecting circular segments. Since we rarely observed experimentally intermediate  
 1078 states (Raote *et al.*, 2018), we assume that the dynamics of merger and rewetting events is  
 1079 relatively fast so we consider that there is no filament growth during this time. Hence, the fila-  
 1080 ment length in the fused situation is just twice the length of a single wetting filament, and also  
 1081 that restructuring is fast enough to not let the COPII patch grow, so the membrane area covered  
 1082 by COPII subunits in the fused ring configuration is twice the area covered by a pre-fused single  
 1083 ERES. With these two conditions, and the geometry schematized in **Figure S4C**, we can write  
 1084 down the expression for the free energy change per ERES with respect to the initial situation  
 1085 as

$$1086 \Delta F_{spread}(\beta) = \kappa_T \left[ \left( \frac{1}{R_1} - c_0 \right)^2 (\pi - \beta) R_1 + \left( \frac{1}{R_2} + c_0 \right)^2 (\pi R - (\pi - \beta) R_1) - \left( \frac{1}{R} - \right. \right.$$

$$1087 \left. \left. c_0 \right)^2 \pi R \right], \quad (\text{A3})$$

1088 where  $R_2 = 2(R - (1 - \beta/\pi)R_1)/(1 - 2\beta/\pi)$ , and  $R_1$  is given by the solution of the quartic  
 1089 equation,

$$1090 3R^2 - 4RR_1 + R_1^2 - \frac{(2R^2 - 4RR_1 + R_1^2)\beta}{\pi} + (R_1 - 2R) \sqrt{\frac{(R_1 - 2R)^2 \cos^2 \beta}{(\pi - 2\beta)^2}} \sin \beta = 0. \quad (\text{A4})$$

1091



1098 The angle  $\beta$  is then optimized as that corresponding to the minimal energy of the fused ring  
1099 configuration with respect to the isolated ring configuration (**Figure S4D**).

1100

1101 We computed the energy barrier required to be overcome to allow ring fusion,  $\Delta F_{fusion}$  (**Ap-**  
1102 **pendix 1–Figure 1C**). Our results indicate that a decrease in the interaction energy between  
1103 TANGO1 filaments and COPII subunits leads to lower fusion energy barriers (**Appendix 1–**  
1104 **Figure 1C**) and hence more efficient ring fusion, as experimentally observed (Raote *et al.*,  
1105 2018). We also computed whether the overall fusion process is energetically favorable or not,  
1106 which indicates whether the fused configuration can be even formed *de novo* before circular  
1107 rings are fully assembled, indicating that negative filament spontaneous curvatures promote the  
1108 stabilization of the fused ring configuration since they stabilize association of the concave face  
1109 of the filament with COPII subunits (**Figure S4G**). Altogether, the results of our theoretical  
1110 model show that the closer the system is to the wetting-dewetting transition, the more feasible  
1111 it is to observe spontaneous formation of fused TANGO1 rings (**Appendix 1–Figure 1D**). These  
1112 results agree with the experimental observation that in cells expressing the mutant of TANGO1  
1113 that is unable to bind COPII subunits (TANGO1- $\Delta$ PRD mutant), TANGO1 appears as a set of  
1114 linearly or planarly fused rings (Raote *et al.*, 2018).

1115

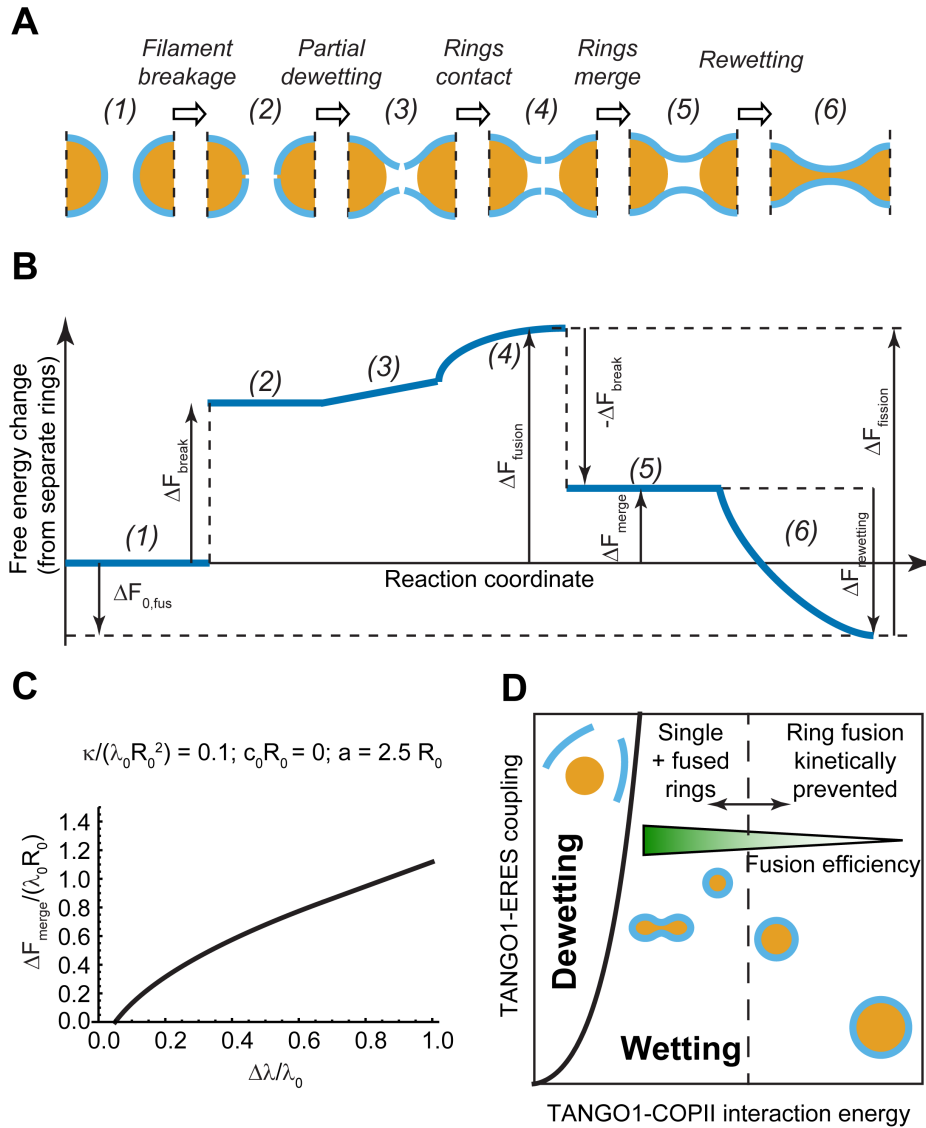

1116

1117

1118

**Appendix 1 – Figure 1. Formation of fused TANGO1 rings.**

1119

1120

1121

1122

1123

1124

1125

1126

1127

1128

1129

(A) Schematic representation of the pathway leading to fusion of nearby ERES wetted by TANGO1 filaments (see text for details). (B) Schematic representation of the free energy transitions paralleling the ring fusion pathway in panel (A) (see text for details). (C) Ring merger energy (that is, the barrier for ring fusion minus the filament breaking energy) as a function of the linactant strength of TANGO1,  $\Delta\lambda$ , for rings separated by a distance  $a = 2.5 R_0$ , a dimensionless bending rigidity of the filament  $\bar{\kappa}_r = 0.1$  and a vanishing spontaneous curvature. (D) Summary of the model's results, indicating the wetting-dewetting transition as in Figure 2A. Cartoons of the expected structures are shown as well as the efficiency of ring fusion. Qualitatively, for values larger than some cutoff value of the TANGO1-COPII interaction energy, which is linked to  $\Delta\lambda$ , the energy barrier for ring fusion is too large and ring fusion is kinetically prevented.

## 1130 REFERENCES

1131

1132 Apodaca, G. (2002) ‘Modulation of membrane traffic by mechanical stimuli’, *American*  
1133 *Journal of Physiology-Renal Physiology*. American Physiological Society Bethesda, MD ,  
1134 282(2), pp. F179–F190. doi: 10.1152/ajprenal.2002.282.2.F179.

1135 Aridor, M. (2018) ‘COPII gets in shape: Lessons derived from morphological aspects of early  
1136 secretion.’, *Traffic (Copenhagen, Denmark)*, 19(11), pp. 823–839. doi: 10.1111/tra.12603.

1137 Bard, F. *et al.* (2006) ‘Functional genomics reveals genes involved in protein secretion and  
1138 Golgi organization.’, *Nature*, 439(February), pp. 604–607. doi: 10.1038/nature04377.

1139 Beck, M. and Baumeister, W. (2016) ‘Cryo-Electron Tomography: Can it Reveal the  
1140 Molecular Sociology of Cells in Atomic Detail?’, *Trends in Cell Biology*, 26(11), pp. 825–  
1141 837. doi: 10.1016/j.tcb.2016.08.006.

1142 Bevis, B. J. *et al.* (2002) ‘De novo formation of transitional ER sites and Golgi structures in  
1143 *Pichia pastoris*.’, *Nature cell biology*, 4(10), pp. 750–6. doi: 10.1038/ncb852.

1144 Block, S. M. *et al.* (2003) ‘Probing the kinesin reaction cycle with a 2D optical force clamp.’,  
1145 *Proceedings of the National Academy of Sciences of the United States of America*, 100(5), pp.  
1146 2351–6. doi: 10.1073/pnas.0436709100.

1147 Bottanelli, F. *et al.* (2016) ‘Two-colour live-cell nanoscale imaging of intracellular targets’,  
1148 *Nature Communications*. Nature Publishing Group, 7(1), p. 10778. doi:  
1149 10.1038/ncomms10778.

1150 Boucrot, E. *et al.* (2012) ‘Membrane fission is promoted by insertion of amphipathic helices  
1151 and is restricted by crescent BAR domains’, *Cell*. 2012/04/03, 149(1), pp. 124–136. doi:  
1152 10.1016/j.cell.2012.01.047.

1153 Bykov, Y. S. *et al.* (2017) ‘The structure of the COPI coat determined within the cell’, *eLife*,  
1154 6. doi: 10.7554/eLife.32493.

1155 Campelo, F. *et al.* (2017) ‘Sphingomyelin metabolism controls the shape and function of the  
1156 golgi cisternae’, *eLife*, 6. doi: 10.7554/eLife.24603.

1157 Derényi, I., Jülicher, F. and Prost, J. (2002) ‘Formation and interaction of membrane tubes.’,  
1158 *Physical review letters*, 88(23), p. 238101. doi: 10.1103/PhysRevLett.88.238101.

1159 Doi, M. (Masao) and Edwards, S. F. (Sam F. (1986) *The theory of polymer dynamics*.  
1160 Clarendon Press.

1161 Faini, M. *et al.* (2013) ‘Vesicle coats: structure, function, and general principles of  
1162 assembly.’, *Trends in cell biology*, 23(6), pp. 279–88. doi: 10.1016/j.tcb.2013.01.005.

1163 Farhan, H. *et al.* (2008) ‘Adaptation of endoplasmic reticulum exit sites to acute and chronic  
1164 increases in cargo load.’, *The EMBO journal*, 27(15), pp. 2043–54. doi:  
1165 10.1038/emboj.2008.136.

1166 Fletcher, D. A. and Mullins, R. D. (2010) ‘Cell mechanics and the cytoskeleton.’, *Nature*,  
1167 463(7280), pp. 485–92. doi: 10.1038/nature08908.

1168 Foret, L. (2005) ‘A simple mechanism of raft formation in two-component fluid membranes’,  
1169 *Europhysics Letters (EPL)*. IOP Publishing, 71(3), pp. 508–514. doi: 10.1209/epl/i2005-  
1170 10098-x.

1171 Forster, R. *et al.* (2006) ‘Secretory Cargo Regulates the Turnover of COPII Subunits at Single  
1172 ER Exit Sites’, *Current Biology*, 16(2), pp. 173–179. doi: 10.1016/j.cub.2005.11.076.

1173 Frolov, V. A. J. *et al.* (2006) ‘“Entropic Traps” in the Kinetics of Phase Separation in  
1174 Multicomponent Membranes Stabilize Nanodomains’, *Biophysical Journal*, 91(1), pp. 189–  
1175 205. doi: 10.1529/biophysj.105.068502.

- 1176 Glick, B. S. (2017) *New insights into protein secretion: TANGO1 runs rings around the COP*  
1177 *II coat*, *Journal of Cell Biology*. doi: 10.1083/jcb.201701142.
- 1178 Gorur, A. *et al.* (2017) ‘COPII-coated membranes function as transport carriers of  
1179 intracellular procollagen I’, 216(6), pp. 1745–1759. doi: 10.1083/jcb.201702135.
- 1180 Hammond, A. T. and Glick, B. S. (2000) ‘Dynamics of Transitional Endoplasmic Reticulum  
1181 Sites in Vertebrate Cells’, *Molecular Biology of the Cell*. Edited by H. R. B. Pelham, 11(9),  
1182 pp. 3013–3030. doi: 10.1091/mbc.11.9.3013.
- 1183 Hassinger, J. E. *et al.* (2017) ‘Design principles for robust vesiculation in clathrin-mediated  
1184 endocytosis.’, *Proceedings of the National Academy of Sciences of the United States of*  
1185 *America*. National Academy of Sciences, 114(7), pp. E1118–E1127. doi:  
1186 10.1073/pnas.1617705114.
- 1187 Heinzer, S. *et al.* (2008) ‘A model for the self-organization of exit sites in the endoplasmic  
1188 reticulum.’, *Journal of cell science*, 121(Pt 1), pp. 55–64. doi: 10.1242/jcs.013383.
- 1189 Hughes, H. *et al.* (2009) ‘Organisation of human ER-exit sites: requirements for the  
1190 localisation of Sec16 to transitional ER.’, *Journal of cell science*, 122(Pt 16), pp. 2924–34.  
1191 doi: 10.1242/jcs.044032.
- 1192 Hutchings, J. *et al.* (2018) ‘Subtomogram averaging of COPII assemblies reveals how coat  
1193 organization dictates membrane shape’, *Nature Communications*, 9(1), p. 4154. doi:  
1194 10.1038/s41467-018-06577-4.
- 1195 Iglič, A., Slivnik, T. and Kralj-Iglič, V. (2007) ‘Elastic properties of biological membranes  
1196 influenced by attached proteins’, *Journal of Biomechanics*, 40(11), pp. 2492–2500. doi:  
1197 10.1016/j.jbiomech.2006.11.005.
- 1198 Ishikawa, Y. *et al.* (2016) ‘Intracellular mechanisms of molecular recognition and sorting for  
1199 transport of large extracellular matrix molecules’, *Proceedings of the National Academy of*  
1200 *Sciences*. doi: 10.1073/pnas.16095711113.
- 1201 Ito, Y., Uemura, T. and Nakano, A. (2018) ‘The Golgi entry core compartment functions as a  
1202 COPII-independent scaffold for ER-to-Golgi transport in plant cells’, *J Cell Sci*. The  
1203 Company of Biologists Ltd, 131(2), p. jcs203893. doi: 10.1242/JCS.203893.
- 1204 Kadler, K. E. *et al.* (2007) ‘Collagens at a glance’, *Journal of Cell Science*, 120(12).
- 1205 Kosmalska, A. J. *et al.* (2015) ‘Physical principles of membrane remodelling during cell  
1206 mechanoadaptation’, *Nature Communications*. Nature Publishing Group, 6(1), p. 7292. doi:  
1207 10.1038/ncomms8292.
- 1208 Koster, G. *et al.* (2003) ‘Membrane tube formation from giant vesicles by dynamic  
1209 association of motor proteins’, *Proceedings of the National Academy of Sciences*, 100(26),  
1210 pp. 15583–15588. doi: 10.1073/pnas.2531786100.
- 1211 Kovar, D. R. and Pollard, T. D. (2004) ‘Insertional assembly of actin filament barbed ends in  
1212 association with formins produces piconewton forces.’, *Proceedings of the National Academy*  
1213 *of Sciences of the United States of America*, 101(41), pp. 14725–30. doi:  
1214 10.1073/pnas.0405902101.
- 1215 Kozlov, M. M. *et al.* (2014) ‘Mechanisms shaping cell membranes’, *Current Opinion in Cell*  
1216 *Biology*, 29(1). doi: 10.1016/j.ceb.2014.03.006.
- 1217 Leduc, C. *et al.* (2004) ‘Cooperative extraction of membrane nanotubes by molecular  
1218 motors’, *Proceedings of the National Academy of Sciences*, 101(49), pp. 17096–17101. doi:  
1219 10.1073/pnas.0406598101.
- 1220 Lee, S.-H. *et al.* (2012) ‘Counting single photoactivatable fluorescent molecules by  
1221 photoactivated localization microscopy (PALM)’, *Proceedings of the National Academy of*  
1222 *Sciences*, 109(43), pp. 17436–17441. doi: 10.1073/pnas.1215175109.

- 1223 Liu, M. *et al.* (2017) ‘Tango1 spatially organizes ER exit sites to control ER export’, *Journal*  
1224 *of Cell Biology*. doi: 10.1083/jcb.201611088.
- 1225 Liu, T.-L. *et al.* (2018) ‘Observing the cell in its native state: Imaging subcellular dynamics in  
1226 multicellular organisms.’, *Science (New York, N.Y.)*. American Association for the  
1227 Advancement of Science, 360(6386), p. eaaq1392. doi: 10.1126/science.aaq1392.
- 1228 Luxton, G. W. G. *et al.* (2010) ‘Linear arrays of nuclear envelope proteins harness retrograde  
1229 actin flow for nuclear movement.’, *Science (New York, N.Y.)*, 329(5994), pp. 956–9. doi:  
1230 10.1126/science.1189072.
- 1231 Ma, W. and Goldberg, J. (2016) ‘TANGO1/cTAGE5 receptor as a polyvalent template for  
1232 assembly of large COPII coats’, *Proceedings of the National Academy of Sciences*. doi:  
1233 10.1073/pnas.1605916113.
- 1234 Maeda, M., Katada, T. and Saito, K. (2017) ‘TANGO1 recruits Sec16 to coordinately  
1235 organize ER exit sites for efficient secretion’, *The Journal of Cell Biology*, 216(6), pp. 1731–  
1236 1743. doi: 10.1083/jcb.201703084.
- 1237 Maeda, M., Saito, K. and Katada, T. (2016) ‘Distinct isoform-specific complexes of  
1238 TANGO1 cooperatively facilitate collagen secretion from the endoplasmic reticulum’,  
1239 *Molecular Biology of the Cell*. doi: 10.1091/mbc.E16-03-0196.
- 1240 McCaughey, J. *et al.* (2019) ‘ER-to-Golgi trafficking of procollagen in the absence of large  
1241 carriers’, *The Journal of Cell Biology*, 218(3), pp. 929–948. doi: 10.1083/jcb.201806035.
- 1242 Miller, E. A. and Schekman, R. (2013) ‘COPII - a flexible vesicle formation system.’,  
1243 *Current opinion in cell biology*, 25(4), pp. 420–7. doi: 10.1016/j.ceb.2013.04.005.
- 1244 Mironov, A. A. *et al.* (2003) ‘ER-to-Golgi carriers arise through direct en bloc protrusion and  
1245 multistage maturation of specialized ER exit domains.’, *Developmental cell*. Elsevier, 5(4),  
1246 pp. 583–94. doi: 10.1016/S1534-5807(03)00294-6.
- 1247 Mouw, J. K., Ou, G. and Weaver, V. M. (2014) ‘Extracellular matrix assembly: a multiscale  
1248 deconstruction’, *Nature Reviews Molecular Cell Biology*, 15(12), pp. 771–785. doi:  
1249 10.1038/nrm3902.
- 1250 Naito, H. and Ou-Yang, Z. (1997) ‘Analytical solutions to Helfrich variation problem for  
1251 shapes of lipid bilayer vesicles’. 物性研究刊行会.
- 1252 Niggemann, G., Kummrow, M. and Helfrich, W. (1995) ‘The bending rigidity of  
1253 phosphatidylcholine bilayers: dependences on experimental method, sample cell sealing and  
1254 temperature’, *Journal de Physique II*. EDP Sciences, 5(3), pp. 413–425. doi:  
1255 10.1051/jp2:1995141.
- 1256 Nixon-Abell, J. *et al.* (2016) ‘Increased spatiotemporal resolution reveals highly dynamic  
1257 dense tubular matrices in the peripheral ER’, *Science*, 354(6311).
- 1258 Nogueira, C. *et al.* (2014) ‘SLY1 and syntaxin 18 specify a distinct pathway for procollagen  
1259 VII export from the endoplasmic reticulum’, *eLife*. doi: 10.7554/eLife.02784.
- 1260 Omari, S. *et al.* (2018) ‘Noncanonical autophagy at ER exit sites regulates procollagen  
1261 turnover.’, *Proceedings of the National Academy of Sciences of the United States of America*.  
1262 National Academy of Sciences, 115(43), pp. E10099–E10108. doi:  
1263 10.1073/pnas.1814552115.
- 1264 Pinot, M., Goud, B. and Manneville, J.-B. (2010) ‘Physical aspects of COPI vesicle  
1265 formation.’, *Molecular membrane biology*, 27(8), pp. 428–42. doi:  
1266 10.3109/09687688.2010.510485.
- 1267 Raote, I. *et al.* (2017) ‘TANGO1 assembles into rings around COPII coats at ER exit sites.’,  
1268 *The Journal of cell biology*. Rockefeller University Press, 216(4), pp. 901–909. doi:  
1269 10.1083/jcb.201608080.

- 1270 Raote, I. *et al.* (2018) ‘TANGO1 builds a machine for collagen export by recruiting and  
1271 spatially organizing COPII, tethers and membranes’, *eLife*, 7. doi: 10.7554/eLife.32723.
- 1272 Raote, I. and Malhotra, V. (2019) ‘Protein transport by vesicles and tunnels.’, *The Journal of*  
1273 *cell biology*. Rockefeller University Press, p. jcb.201811073. doi: 10.1083/jcb.201811073.
- 1274 Robinson, D. G. *et al.* (2015) ‘Vesicles versus Tubes: Is Endoplasmic Reticulum-Golgi  
1275 Transport in Plants Fundamentally Different from Other Eukaryotes?’, *Plant Physiology*.  
1276 American Society of Plant Biologists, 168(2), pp. 393–406. doi: 10.1104/PP.15.00124.
- 1277 Roux, A. *et al.* (2002) ‘A minimal system allowing tubulation with molecular motors pulling  
1278 on giant liposomes’, *Proceedings of the National Academy of Sciences*, 99(8), pp. 5394–5399.  
1279 doi: 10.1073/pnas.082107299.
- 1280 Roux, K. J. *et al.* (2018) ‘BioID: A Screen for Protein-Protein Interactions’, in *Current*  
1281 *Protocols in Protein Science*. Hoboken, NJ, USA: John Wiley & Sons, Inc., p. 19.23.1-  
1282 19.23.15. doi: 10.1002/cpps.51.
- 1283 Saito, K. *et al.* (2009) ‘TANGO1 facilitates cargo loading at endoplasmic reticulum exit  
1284 sites’, *Cell*. 2009/03/10, 136(5), pp. 891–902. doi: S0092-8674(08)01630-9  
1285 [pii]10.1016/j.cell.2008.12.025.
- 1286 Saito, K. *et al.* (2011) ‘cTAGE5 mediates collagen secretion through interaction with  
1287 TANGO1 at endoplasmic reticulum exit sites’, *Mol Biol Cell*. 2011/04/29, 22(13), pp. 2301–  
1288 2308. doi: mbc.E11-02-0143 [pii]10.1091/mbc.E11-02-0143.
- 1289 Saito, K. *et al.* (2014) ‘Concentration of Sec12 at ER exit sites via interaction with cTAGE5  
1290 is required for collagen export’, *Journal of Cell Biology*. doi: 10.1083/jcb.201312062.
- 1291 Saleem, M. *et al.* (2015) ‘A balance between membrane elasticity and polymerization energy  
1292 sets the shape of spherical clathrin coats’, *Nature Communications*, 6(1), p. 6249. doi:  
1293 10.1038/ncomms7249.
- 1294 Santos, A. J. M. *et al.* (2015) ‘TANGO1 recruits ERGIC membranes to the endoplasmic  
1295 reticulum for procollagen export’, *eLife*. doi: 10.7554/eLife.10982.001.
- 1296 Sasaki, N. *et al.* (2018) ‘cTAGE5 acts as a Sar1 GTPase regulator for collagen export’,  
1297 *bioRxiv*, p. 452904. doi: 10.1101/452904.
- 1298 Schmid, F. (2017) ‘Physical mechanisms of micro- and nanodomain formation in  
1299 multicomponent lipid membranes’, *Biochimica et Biophysica Acta (BBA) - Biomembranes*,  
1300 1859(4), pp. 509–528. doi: 10.1016/j.bbamem.2016.10.021.
- 1301 Schroeder, L. K. *et al.* (2019) ‘Dynamic nanoscale morphology of the ER surveyed by STED  
1302 microscopy.’, *The Journal of cell biology*. Rockefeller University Press, 218(1), pp. 83–96.  
1303 doi: 10.1083/jcb.201809107.
- 1304 Sens, P. and Rao, M. (2013) ‘Chapter 18 – (Re)Modeling the Golgi’, in *Methods in Cell*  
1305 *Biology*, pp. 299–310. doi: 10.1016/B978-0-12-417164-0.00018-5.
- 1306 Sens, P. and Turner, M. S. (2006) ‘Budded membrane microdomains as tension regulators’,  
1307 *Physical Review E*, 73(3), p. 031918. doi: 10.1103/PhysRevE.73.031918.
- 1308 Trabelsi, S. *et al.* (2008) ‘Linactants: Surfactant Analogues in Two Dimensions’, *Physical*  
1309 *Review Letters*, 100(3), p. 037802. doi: 10.1103/PhysRevLett.100.037802.
- 1310 Upadhyaya, A. and Sheetz, M. P. (2004) ‘Tension in tubulovesicular networks of Golgi and  
1311 endoplasmic reticulum membranes.’, *Biophysical journal*, 86(5), pp. 2923–8. doi:  
1312 10.1016/S0006-3495(04)74343-X.
- 1313 Venditti, R. *et al.* (2012) ‘Sedlin controls the ER export of procollagen by regulating the Sar1  
1314 cycle.’, *Science (New York, N.Y.)*, 337(6102), pp. 1668–72. doi: 10.1126/science.1224947.
- 1315 Watson, P. *et al.* (2005) ‘Coupling of ER exit to microtubules through direct interaction of

- 1316 COPII with dynactin.’, *Nature cell biology*, 7(1), pp. 48–55. doi: 10.1038/ncb1206.
- 1317 Wilson, D. G. *et al.* (2011) ‘Global defects in collagen secretion in a Mia3/TANGO1  
1318 knockout mouse’, *J Cell Biol.* 2011/05/25, 193(5), pp. 935–951. doi: jcb.201007162  
1319 [pii]10.1083/jcb.201007162.
- 1320 Wolff, J., Komura, S. and Andelman, D. (2015) ‘Budding of domains in mixed bilayer  
1321 membranes’, *Physical Review E*, 91(1), p. 012708. doi: 10.1103/PhysRevE.91.012708.
- 1322 Wu, X.-S. *et al.* (2017) ‘Membrane Tension Inhibits Rapid and Slow Endocytosis in  
1323 Secretory Cells.’, *Biophysical journal*, 113(11), pp. 2406–2414. doi:  
1324 10.1016/j.bpj.2017.09.035.
- 1325 Yang, S.-T., Kiessling, V. and Tamm, L. K. (2016) ‘Line tension at lipid phase boundaries as  
1326 driving force for HIV fusion peptide-mediated fusion’, *Nature Communications*, 7(1), p.  
1327 11401. doi: 10.1038/ncomms11401.
- 1328 Yuan, L. *et al.* (2018) ‘TANGO1 and SEC12 are copackaged with procollagen I to facilitate  
1329 the generation of large COPII carriers’, *Proc Natl Acad Sci U S A*, 115(52), pp. E12255–  
1330 E12264. doi: 10.1073/pnas.1814810115.
- 1331 Zanetti, G. *et al.* (2013) ‘The structure of the COPII transport-vesicle coat assembled on  
1332 membranes’, *Elife*. 2013/09/26, 2, p. e00951. doi: 10.7554/eLife.00951.
- 1333 Zeuschner, D. *et al.* (2006) ‘Immuno-electron tomography of ER exit sites reveals the  
1334 existence of free COPII-coated transport carriers’, *Nature Cell Biology*. Nature Publishing  
1335 Group, 8(4), pp. 377–383. doi: 10.1038/ncb1371.
- 1336
- 1337

## 1338 SUPPLEMENTARY INFORMATION

1339

### 1340 COMPUTATION OF THE PREFERRED ERES SIZE UNDER TANGO1 DEWETTING 1341 CONDITIONS

1342 To compute the preferred ERES size independently of TANGO1 interaction, we consider the  
1343 situation of complete dewetting,  $\omega = 0$ , which allows us to simplify **Equation (2)** in the main  
1344 text as  $\bar{f}(\omega = 0) = \frac{2}{\rho} + \frac{1}{2}\bar{f}_0(\rho - 1)^2$ . Under these conditions, energy minimization, corre-

1345 sponding to the solutions of the equation  $\left. \frac{\partial \bar{f}(\omega=0)}{\partial \rho} \right|_{\rho=\rho_{unwett}} = 0$ , can be expressed as a third

1346 order equation with a real solution for the optimal ERES radius given by

1347

$$1348 \quad \rho_{unwett} = \frac{1}{3}(1 + \Xi + 1/\Xi) \quad : \quad \Xi = \left( 1 + \frac{27}{\bar{f}_0} + 3\sqrt{\frac{6}{\bar{f}_0} + \left(\frac{9}{\bar{f}_0}\right)^2} \right)^{1/3}, \quad (\text{S1})$$

1349

1350 which only depends on the dimensionless coupling factor  $\bar{f}_0 = f_0 R_0^3 / \lambda_0$ , and is always larger  
1351 than 1, since the line tension  $\lambda_0$  in **Equation (1)** in the main text is positive by definition and  
1352 would always work to reduce the amount of ERES by increasing their size (thus favoring ERES  
1353 growth).

1354

### 1355 CRITICAL FILAMENT SPONTANEOUS CURVATURE

1356 Specifically, we computed how the optimal ring size varies as a response to a decrease in the  
1357 linactant strength (parameter  $\overline{\Delta\lambda}$ ). From **Equation (4)**, we can calculate the rate of change of  
1358 the ring radius with respect to changes in  $\overline{\Delta\lambda}$ . From this, we can see that, for  $\rho = 1$ , increasing  
1359 the COPII domain line tension (decreasing the values of  $\overline{\Delta\lambda}$ ), leads to larger rings except for  
1360 some extreme negative values of the filament spontaneous curvature, smaller than a critical  
1361 spontaneous curvature,  $c_0 < -\frac{3}{2}\left(1 + \frac{f_0}{6\kappa_T}\right) = c_{0,crit}$ . However, for such values, the line energy

1362 gain associated with the filament wetting the ERES (**Equation (M2)**), is  $\Delta F_{line,wett} = \Delta\lambda L$ ,  
1363 whereas the free energy loss associated with bending the filament upon wetting (**Equation**

1364 **(M1)**) is  $\Delta F_{bend,wett} = \frac{\kappa_T}{2R_0^2}\left(\frac{5}{2} + \frac{f_0}{\kappa_T}\right)^2 L$ , where we considered the critical spontaneous curva-

1365 ture calculated above. Under these conditions, wetting only occurs if the energy gain due to the  
1366 line tension decrease is larger than the energy loss upon filament bending, that is,  $\Delta F_{line,wett} \geq$

1367  $\Delta F_{bend,wett}$ . This implies that  $\overline{\Delta\lambda} \geq \frac{1}{2}\overline{\kappa_T}\left(\frac{5}{2} + \frac{\bar{f}_0}{\overline{\kappa_T}}\right)^2$ . Since, by definition,  $\overline{\Delta\lambda} \leq 1$ , there is only

1368 a very small range of parameters  $\overline{\kappa_T}$  and  $\bar{f}_0$ , given by  $0 \leq \bar{f}_0 \leq -\frac{5\overline{\kappa_T}}{2} + \sqrt{2\overline{\kappa_T}}$ , for which there

1369 is filament wetting of the COPII patch at spontaneous curvatures smaller than the critical spon-

1370 taneous curvatures. Hence, according to our model the reduction in ring size in cells expressing

1371 TANGO1- $\Delta$ PRD as compared to full-length TANGO1-expressing cells can hardly be explained

1372 solely by the reduced interaction of the TANGO1 filament with Sec23.



## SUPPLEMENTARY FIGURE LEGENDS

1373

1374

1375 **Figure S1. Multiple ring geometry.**

1376 (A) Description of the ring geometry (of radius  $R$ ) for neighboring rings, assembled in a hexagonal lattice and separated by a center-to-center distance,  $a$ . The COPII components are schematically represented in orange, whereas the wetting TANGO1 filament is shown in blue.

1379

1380 **Figure S2. Computed sizes of the TANGO1 rings.**

1381 (A-D) Numerically computed phase diagrams showing the wetting-dewetting transitions (solid black lines) as a function of the line tension reduction ( $\overline{\Delta\lambda}$ ) and the dimensionless filament bending rigidity,  $\overline{\kappa_T}$ , (A, B); the dimensionless coupling factor,  $\overline{f_0}$ , (C); or the filament spontaneous curvature,  $\overline{c_0}$  (D). The parameters are taken as indicates, and in (A-C) the filament spontaneous curvature is equal to 0. In the parameter space where wetting is predicted, the optimal ring size,  $\rho_{ring}$ , is shown in color code. Dashed lines represent the iso-size lines, and arrows represent possible trajectories in the parameter space allowing for a reduction in the TANGO1 ring size while reducing affinity of TANGO1 filament for COPII subunits.

1389

1390 **Figure S3. Geometry and physical forces in the transport intermediate generation model.**

1391 (A) TANGO1 rings assembling on the ER membrane are depicted in light blue, accounting for a line tension reduction of the COPII coat,  $\Delta\lambda$ . The ER membrane is shown in black, associated with a tension,  $\sigma_0$ . The COPII coat polymerizing on the membrane is depicted in orange, and accounts for a coat binding free energy (or chemical potential),  $\mu_c$ , and a COPII coat line tension,  $\lambda_0$ . Packaged procollagen rods are shown in magenta, which can contribute with a pushing normal force,  $N$ . Finally, ERGIC53-containing membranes tethered to the export site through the NRZ complex (dark blue) can lead to a membrane tension reduction,  $\Delta\sigma$ . (B) Scheme of the carrier geometry used for shallow buds (i), deep buds (ii); and pearled carriers (iii). See Materials and Methods for the detailed description of the geometric parameters.

1400

1401 **Figure S4. Physical model of TANGO1 ring fusion.**

1402 (A) Schematic representation of the pathway leading to fusion of nearby ERES wetted by TANGO1 filaments, as shown in Figure 3A, indicating the main geometric parameters used in our calculations. (B) Computed free energy changes (for fusion in orange, for filament breaking in black, and for merge in blue, see the explanatory energy scheme shown in (A)), plotted as a function of the dewetting angle. No ring fusion is possible for dewetting angles smaller than a minimal dewetting angle  $\alpha_{min}$  (see supplementary text for details). The model parameters used for this plot are designated in the figure. (C) Simplified geometry used for the fused ring spreading computations (top), and examples shown for three different  $\beta$  angles (bottom). (D) Plot of the free energy of the fused, spread two-ring configuration as a function of the spreading angle,  $\beta$ , showing the angle,  $\beta_{opt}$ , corresponding to the spreading configuration of minimal energy. (E, F) Ring merger energy (that is, the barrier for ring fusion minus the filament breaking energy) as a function of the distance between rings,  $a$ , (E); and as a function of the dimensionless bending rigidity of the TANGO1 filament (F), for the values of the rest of parameters as shown in the legends of these panels. (G) Plot of the free energy change between the separated rings and the fused and spread rings as a function of the ring spontaneous curvature. Positive regions indicate regions where fused rings correspond to locally stable (metastable) states (indicated by the shaded region of the diagram), whereas regions with a negative free energy change indicate globally stable fused rings.

1419
